# Supplementary material for: Birth Intervals and Health in Adulthood: A Comparison of Siblings Using Swedish Register Data
Source: Springer Nature journal article supplement (doi:10.1007/s13524-018-0673-8), 2018-05-21
Supplement: MOESM1 [file 15780088]

## Online Resource 1

TABLE S1. Sample Exclusion Process

| <b>Preceding Interval</b>            | 1962-1979 |            | 1938-1960 |            |
|--------------------------------------|-----------|------------|-----------|------------|
|                                      | N         | N excluded | N         | N excluded |
| Total born in Sweden                 | 1,951,202 |            | 2,491,059 |            |
| ID for both parents                  | 1,927,677 | 23,525     | 2,210,012 | 281,047    |
| All siblings born in Sweden          | 1,893,446 | 34,231     | 2,193,609 | 16,403     |
| No multiple births                   | 1,846,327 | 47,119     | 1,980,743 | 212,866    |
| No half-siblings                     | 1,347,819 | 498,508    | 1,735,140 | 245,603    |
| Sibling group size >2                | 570,595   | 777,224    | 871,081   | 864,059    |
| Males only                           | 294,808   | 275,787    | -         | -          |
| Outmigration or death before 1990    | -         | -          | 836,583   | 34,498     |
| No first-borns                       | 209,361   | 85,447     | 596,833   | 239,750    |
| Cohort cut                           | 125,340   | 84,021     | 581,544   | 15,289     |
| Within-group variance in mortality   | -         | -          | 159,554   | 421,990    |
| No missing values on model variables | ~105,000  | 20,340     | 159,554   | 0          |
| Final                                | ~105,000  |            | 159,554   |            |
| <b>Subsequent Interval</b>           | 1962-1979 |            | 1938-1960 |            |
|                                      | N         | N excluded | N         | N excluded |
| Total born in Sweden                 | 1,951,202 |            | 2,491,059 |            |
| ID for both parents                  | 1,927,677 | 23,525     | 2,210,012 | 281,047    |
| All siblings born in Sweden          | 1,893,446 | 34,231     | 2,193,609 | 16,403     |
| No multiple births                   | 1,846,327 | 47,119     | 1,980,743 | 212,866    |
| No half-siblings                     | 1,347,819 | 498,508    | 1,735,140 | 245,603    |
| Sibling group size >2                | 570,595   | 777,224    | 871,081   | 864,059    |
| Males only                           | 294,808   | 275,787    | -         | -          |
| Outmigration or death before 1990    | -         | -          | 836,583   | 34,498     |
| No last-borns                        | 198,431   | 96,377     | 639,628   | 196,955    |
| Cohort cut                           | 132,618   | 65,813     | 606,515   | 33,113     |
| Within-group variance in mortality   | -         | -          | 150,907   | 455,608    |
| No missing values on model variables | ~110,000  | 22,618     | 150,907   | 0          |
| Final                                | ~110,000  |            | 150,907   |            |

Note: Final sample for 1962-1979 cohorts varies slightly by outcome variable.



TABLE S3. Descriptive Statistics: Length of the Preceding Birth Interval in Relation to Being Overweight or Obese at Ages 17-20, and Mortality at Ages 30-74.

|                        |                                       | Preceding Birth Interval |        |        |        |        |        |        |        |        |        |        |        |        |        |        |        |          |        |
|------------------------|---------------------------------------|--------------------------|--------|--------|--------|--------|--------|--------|--------|--------|--------|--------|--------|--------|--------|--------|--------|----------|--------|
|                        |                                       | 9-12                     | 13-18  | 19-24  | 25-30  | 31-36  | 37-42  | 43-48  | 49-54  | 55-60  | 61-66  | 67-72  | 73-78  | 79-84  | 85-90  | 91-96  | >96    | Everyone |        |
| Overweight<br>or Obese | N                                     | 1,132                    | 8,530  | 13,643 | 14,422 | 13,813 | 10,957 | 8,698  | 6,852  | 5,571  | 4,086  | 3,197  | 2,555  | 2,091  | 1,561  | 1,143  | 3,749  | 102,000  |        |
|                        | %                                     | 9.5                      | 10.2   | 9.9    | 9.8    | 11.0   | 11.0   | 11.3   | 11.5   | 13.0   | 13.2   | 13.9   | 14.1   | 15.3   | 15.4   | 17.1   | 18.0   | 11.5     |        |
|                        | Mean                                  | 2.7                      | 2.6    | 2.6    | 2.5    | 2.6    | 2.7    | 2.8    | 2.9    | 3.0    | 3.1    | 3.1    | 3.1    | 3.1    | 3.2    | 3.2    | 3.2    | 3.2      | 2.7    |
|                        | Maternal age                          | 25.0                     | 26.3   | 26.7   | 27.0   | 27.5   | 28.2   | 28.8   | 29.6   | 30.3   | 30.8   | 31.3   | 31.7   | 32.4   | 32.8   | 33.3   | 34.8   | 34.8     | 28.6   |
|                        | Birth year                            | 1969.7                   | 1970.1 | 1970.6 | 1971.0 | 1971.2 | 1971.2 | 1971.2 | 1971.2 | 1971.3 | 1971.3 | 1971.5 | 1971.8 | 1971.9 | 1972.2 | 1972.6 | 1972.8 | 1973.4   | 1971.2 |
|                        | Sibling group size<br>% by birth year | 3.8                      | 3.8    | 3.6    | 3.5    | 3.4    | 3.4    | 3.5    | 3.5    | 3.5    | 3.5    | 3.5    | 3.5    | 3.4    | 3.5    | 3.5    | 3.5    | 3.5      | 3.5    |
| Mortality              | 1962-1964                             | 7.7                      | 9.6    | 7.7    | 7.7    | 13.6   | 4.5    | 5.7    | 2.4    | 10.0   | 0.0    | 0.0    | 0.0    | 0.0    | 25.0   | 0.0    | 33.3   | 8.0      |        |
|                        | 1965-1969                             | 8.1                      | 9.7    | 8.8    | 8.5    | 9.9    | 9.8    | 10.0   | 9.8    | 12.5   | 11.5   | 12.0   | 10.8   | 13.3   | 15.4   | 16.9   | 16.6   | 10.0     |        |
|                        | 1970-1974                             | 11.2                     | 9.3    | 9.7    | 10.0   | 10.8   | 10.9   | 11.1   | 11.8   | 12.0   | 13.5   | 14.5   | 13.7   | 14.8   | 13.7   | 17.1   | 17.3   | 11.5     |        |
|                        | 1975-1979                             | 10.2                     | 13.1   | 12.7   | 11.7   | 12.6   | 13.1   | 13.8   | 13.5   | 15.0   | 14.9   | 15.1   | 17.9   | 18.0   | 17.9   | 17.2   | 19.1   | 13.9     |        |
|                        | Mortality rate<br>(10 <sup>-3</sup> ) | 1.22                     | 1.20   | 1.18   | 1.25   | 1.23   | 1.24   | 1.21   | 1.22   | 1.22   | 1.12   | 1.16   | 1.16   | 1.09   | 1.06   | 1.00   | 0.95   | 0.84     | 1.18   |
|                        | Deaths                                | 659                      | 6,322  | 7,366  | 6,230  | 5,038  | 3,982  | 3,269  | 2,586  | 2,586  | 2,041  | 1,659  | 1,349  | 1,026  | 822    | 596    | 477    | 1,635    | 45,057 |
| Mortality              | Person-time                           | 1.4                      | 13.8   | 16.2   | 13.0   | 10.7   | 8.4    | 7.0    | 5.5    | 4.8    | 3.7    | 3.0    | 3.0    | 2.5    | 2.0    | 1.6    | 1.3    | 5.1      | 100.0  |
|                        | %                                     | 47.0                     | 46.5   | 48.0   | 46.1   | 46.8   | 46.5   | 46.6   | 46.9   | 47.1   | 46.2   | 46.9   | 48.2   | 46.5   | 48.1   | 46.3   | 47.2   | 46.9     |        |
|                        | Birth order                           | 3.1                      | 3.3    | 3.3    | 3.3    | 3.2    | 3.2    | 3.2    | 3.2    | 3.2    | 3.2    | 3.2    | 3.2    | 3.3    | 3.3    | 3.3    | 3.3    | 3.3      | 3.2    |
|                        | Maternal age                          | 26.8                     | 28.0   | 29.2   | 29.9   | 30.3   | 30.8   | 31.3   | 31.7   | 32.3   | 32.9   | 33.1   | 33.7   | 34.2   | 34.6   | 35.1   | 36.8   | 36.8     | 30.8   |
|                        | Birth year                            | 1947.0                   | 1946.6 | 1946.8 | 1947.2 | 1947.7 | 1948.0 | 1948.4 | 1948.7 | 1949.2 | 1949.4 | 1949.7 | 1950.2 | 1950.7 | 1951.2 | 1951.6 | 1953.5 | 1948.2   |        |
|                        | Sibling group size                    | 5.0                      | 4.9    | 4.8    | 4.6    | 4.4    | 4.3    | 4.2    | 4.1    | 4.1    | 4.0    | 3.9    | 3.9    | 3.9    | 3.9    | 3.8    | 3.8    | 3.6      | 4.4    |
| Rate by birth year     | 1938-1940                             | 1.50                     | 1.73   | 1.93   | 2.16   | 2.31   | 2.46   | 2.48   | 2.58   | 2.63   | 2.85   | 2.66   | 2.70   | 3.04   | 2.98   | 2.59   | 2.76   | 2.12     |        |
|                        | 1941-1945                             | 1.45                     | 1.31   | 1.30   | 1.41   | 1.42   | 1.48   | 1.52   | 1.73   | 1.59   | 1.85   | 1.87   | 2.01   | 2.16   | 2.01   | 2.39   | 2.58   | 1.47     |        |
|                        | 1946-1950                             | 1.09                     | 1.04   | 1.00   | 1.06   | 1.06   | 1.09   | 1.06   | 1.03   | 0.96   | 1.08   | 1.09   | 1.04   | 1.07   | 1.17   | 1.06   | 1.29   | 1.05     |        |
|                        | 1951-1955                             | 0.97                     | 0.87   | 0.88   | 0.94   | 0.91   | 0.89   | 0.89   | 0.84   | 0.84   | 0.78   | 0.83   | 0.81   | 0.73   | 0.75   | 0.68   | 0.65   | 0.85     |        |
| 1956-1960              | 0.97                                  | 1.00                     | 0.88   | 0.91   | 0.88   | 0.89   | 0.86   | 0.83   | 0.70   | 0.56   | 0.65   | 0.53   | 0.62   | 0.49   | 0.61   | 0.54   | 0.77   |          |        |

TABLE S4. Descriptive Statistics: Length of the Subsequent Birth Interval in Relation to Physical Fitness, Height, and Being Underweight or Severely Underweight at Ages 17-20.

|                                     | Subsequent Birth Interval |        |           |           |           |           |           |           |           |           |           |           |           |           |           |           |           |           |           |
|-------------------------------------|---------------------------|--------|-----------|-----------|-----------|-----------|-----------|-----------|-----------|-----------|-----------|-----------|-----------|-----------|-----------|-----------|-----------|-----------|-----------|
|                                     | 9-12                      | 13-18  | 19-24     | 25-30     | 31-36     | 37-42     | 43-48     | 49-54     | 55-60     | 61-66     | 67-72     | 73-78     | 79-84     | 85-90     | 91-96     | >96       | Everyone  |           |           |
| Physical Fitness                    | N                         | 1,017  | 7,658     | 12,646    | 13,724    | 13,474    | 10,691    | 8,793     | 6,950     | 5,771     | 4,607     | 3,600     | 3,013     | 2,585     | 2,119     | 1,718     | 7,576     | 105,942   |           |
|                                     | Mean fitness              | 294.4  | 298.5     | 301.7     | 302.2     | 302.3     | 301.5     | 302.4     | 301.4     | 299.8     | 301.5     | 300.8     | 302.3     | 301.5     | 299.5     | 299.4     | 299.7     | 301.2     |           |
|                                     | Mean                      | 1.6    | 1.6       | 1.5       | 1.5       | 1.5       | 1.6       | 1.7       | 1.8       | 1.9       | 2.0       | 2.1       | 2.1       | 2.1       | 2.1       | 2.2       | 2.2       | 1.7       |           |
|                                     | Maternal age              | 23.9   | 25.1      | 24.9      | 24.8      | 24.7      | 24.9      | 25.1      | 25.2      | 25.4      | 25.6      | 25.5      | 25.6      | 25.5      | 25.6      | 25.6      | 25.2      | 25.1      |           |
|                                     | Birth year                | 1969.4 | 1970.0    | 1970.6    | 1970.9    | 1971.0    | 1971.0    | 1971.1    | 1971.0    | 1971.0    | 1971.2    | 1971.0    | 1971.0    | 1971.1    | 1971.2    | 1971.2    | 1971.5    | 1971.4    | 1970.9    |
|                                     | Sibling group size        | Mean   | 3.8       | 3.7       | 3.6       | 3.5       | 3.4       | 3.4       | 3.4       | 3.4       | 3.4       | 3.4       | 3.4       | 3.4       | 3.4       | 3.4       | 3.4       | 3.4       | 3.5       |
|                                     | Fitness by birth year     | Mean   | 250.6     | 261.1     | 260.5     | 269.3     | 274.5     | 272.8     | 258.6     | 262.1     | 265.1     | 258.1     | 256.2     | 267.4     | 239.1     | 240.5     | 270.0     | 256.6     | 264.0     |
|                                     |                           | Mean   | 290.4     | 291.2     | 294.7     | 295.6     | 296.7     | 293.7     | 297.3     | 294.8     | 294.1     | 295.6     | 294.7     | 296.3     | 294.3     | 295.3     | 292.6     | 291.7     | 294.7     |
|                                     |                           | Mean   | 302.2     | 307.0     | 307.5     | 308.1     | 306.6     | 307.8     | 306.7     | 306.4     | 304.6     | 306.3     | 305.6     | 307.0     | 305.2     | 301.5     | 303.6     | 304.3     | 306.5     |
|                                     |                           | Mean   | 1970-1974 | 1975-1979 | 1975-1979 | 1975-1979 | 1975-1979 | 1975-1979 | 1975-1979 | 1975-1979 | 1975-1979 | 1975-1979 | 1975-1979 | 1975-1979 | 1975-1979 | 1975-1979 | 1975-1979 | 1975-1979 | 1975-1979 |
| Height (cm)                         | N                         | 1,043  | 8,025     | 13,464    | 14,639    | 14,422    | 11,457    | 9,423     | 7,450     | 6,182     | 4,966     | 3,869     | 3,246     | 2,787     | 2,260     | 1,861     | 8,156     | 113,250   |           |
|                                     | Mean height               | 178.6  | 179.4     | 179.8     | 179.6     | 179.6     | 179.5     | 179.6     | 179.5     | 179.5     | 179.4     | 179.4     | 179.4     | 179.3     | 179.5     | 179.1     | 179.3     | 179.5     |           |
|                                     | Mean                      | 1.6    | 1.6       | 1.5       | 1.5       | 1.5       | 1.6       | 1.7       | 1.8       | 1.9       | 2.0       | 2.0       | 2.1       | 2.1       | 2.1       | 2.2       | 2.2       | 1.7       |           |
|                                     | Maternal age              | 23.9   | 25.1      | 25.0      | 24.8      | 24.7      | 24.9      | 25.1      | 25.3      | 25.5      | 25.6      | 25.6      | 25.6      | 25.6      | 25.6      | 25.6      | 25.2      | 25.1      |           |
|                                     | Birth year                | 1969.6 | 1970.3    | 1971.0    | 1971.3    | 1971.4    | 1971.4    | 1971.5    | 1971.4    | 1971.4    | 1971.6    | 1971.5    | 1971.5    | 1971.6    | 1971.6    | 1971.6    | 1972.0    | 1971.8    | 1971.3    |
|                                     | Sibling group size        | Mean   | 3.8       | 3.7       | 3.6       | 3.5       | 3.4       | 3.4       | 3.4       | 3.4       | 3.4       | 3.4       | 3.4       | 3.4       | 3.4       | 3.4       | 3.4       | 3.4       | 3.5       |
|                                     | Fitness by birth year     | Mean   | 177.9     | 178.3     | 179.7     | 179.3     | 180.1     | 179.2     | 179.1     | 179.0     | 181.0     | 180.1     | 179.3     | 181.5     | 179.1     | 178.0     | 182.5     | 179.1     | 179.4     |
|                                     |                           | Mean   | 1965-1969 | 178.3     | 179.2     | 179.4     | 179.4     | 179.3     | 179.3     | 179.2     | 179.4     | 179.1     | 179.2     | 179.1     | 178.9     | 179.3     | 179.1     | 178.9     | 179.2     |
|                                     |                           | Mean   | 1970-1974 | 178.9     | 179.8     | 179.8     | 179.8     | 179.7     | 179.7     | 179.6     | 179.4     | 179.5     | 179.7     | 179.6     | 179.5     | 179.9     | 179.2     | 179.5     | 179.7     |
|                                     |                           | Mean   | 1975-1979 | 179.1     | 179.4     | 180.1     | 179.8     | 179.8     | 179.7     | 179.7     | 179.8     | 179.6     | 179.5     | 179.4     | 179.3     | 179.5     | 179.1     | 179.3     | 179.7     |
| Underweight or Severely Underweight | N                         | 997    | 7,688     | 12,885    | 14,012    | 13,782    | 10,973    | 8,965     | 7,082     | 5,907     | 4,727     | 3,653     | 3,070     | 2,648     | 2,142     | 1,772     | 7,721     | 108,024   |           |
|                                     | %                         | 6.8    | 7.2       | 7.3       | 7.1       | 7.1       | 7.3       | 7.3       | 7.0       | 7.0       | 6.8       | 6.7       | 6.1       | 6.6       | 7.4       | 6.5       | 7.21      | 108.024   |           |
|                                     | Mean                      | 1.6    | 1.6       | 1.5       | 1.5       | 1.5       | 1.6       | 1.7       | 1.8       | 1.9       | 2.0       | 2.1       | 2.1       | 2.1       | 2.1       | 2.2       | 2.2       | 1.7       |           |
|                                     | Maternal age              | 24.0   | 25.1      | 25.0      | 24.8      | 24.8      | 24.9      | 25.1      | 25.3      | 25.5      | 25.6      | 25.6      | 25.6      | 25.6      | 25.6      | 25.7      | 25.2      | 25.1      |           |
|                                     | Birth year                | 1969.5 | 1970.2    | 1970.9    | 1971.2    | 1971.3    | 1971.3    | 1971.4    | 1971.3    | 1971.3    | 1971.5    | 1971.3    | 1971.4    | 1971.5    | 1971.5    | 1971.9    | 1971.7    | 1971.2    |           |
|                                     | Sibling group size        | Mean   | 3.8       | 3.7       | 3.6       | 3.5       | 3.4       | 3.4       | 3.4       | 3.4       | 3.4       | 3.4       | 3.4       | 3.4       | 3.4       | 3.4       | 3.4       | 3.4       | 3.5       |
|                                     | % by birth year           | Mean   | 12.5      | 11.7      | 10.6      | 10.6      | 10.6      | 10.0      | 10.0      | 8.9       | 8.0       | 8.0       | 12.5      | 12.5      | 11.1      | 20.0      | 6.6       | 7.0       | 7.7       |
|                                     |                           | Mean   | 1965-1964 | 6.1       | 8.5       | 7.9       | 7.4       | 7.2       | 8.0       | 7.4       | 7.0       | 7.9       | 7.2       | 6.4       | 6.6       | 7.0       | 6.6       | 7.2       | 7.5       |
|                                     |                           | Mean   | 1970-1974 | 7.9       | 6.7       | 7.4       | 7.2       | 7.5       | 7.5       | 8.4       | 6.4       | 7.1       | 6.6       | 6.6       | 7.5       | 9.4       | 5.7       | 6.5       | 7.3       |
|                                     |                           | Mean   | 1975-1979 | 6.4       | 4.6       | 6.3       | 6.6       | 6.2       | 7.1       | 5.1       | 5.4       | 5.9       | 5.4       | 5.1       | 5.8       | 5.2       | 7.4       | 5.0       | 6.0       |

TABLE S5. Descriptive Statistics: Length of the Subsequent Birth Interval in Relation to Being Overweight or Obese at Ages 17-20, and Mortality at Ages 30-74.

|                                    | Subsequent Birth Interval |        |        |        |        |        |        |        |        |        |        |        |        |        | >96    | Everyone |        |          |        |
|------------------------------------|---------------------------|--------|--------|--------|--------|--------|--------|--------|--------|--------|--------|--------|--------|--------|--------|----------|--------|----------|--------|
|                                    | 9-12                      | 13-18  | 19-24  | 25-30  | 31-36  | 37-42  | 43-48  | 49-54  | 55-60  | 61-66  | 67-72  | 73-78  | 79-84  | 85-90  |        |          | 91-96  |          |        |
| Overweight or Obese                | N                         | 997    | 7,688  | 12,885 | 14,012 | 13,782 | 10,973 | 8,965  | 7,082  | 5,907  | 4,727  | 3,653  | 3,070  | 2,648  | 2,142  | 1,772    | 7,721  | 108,024  |        |
|                                    | %                         | 11.7   | 10.9   | 10.3   | 10.8   | 10.5   | 10.9   | 10.8   | 11.2   | 11.2   | 10.7   | 10.8   | 10.3   | 11.4   | 10.4   | 11.3     | 10.8   | 11.1     | 10.8   |
|                                    | Mean                      | 1.6    | 1.6    | 1.5    | 1.5    | 1.5    | 1.6    | 1.7    | 1.7    | 1.8    | 1.9    | 2.0    | 2.1    | 2.1    | 2.1    | 2.1      | 2.2    | 2.2      | 1.7    |
|                                    | Maternal age              | 24.0   | 25.1   | 25.0   | 24.8   | 24.8   | 24.9   | 25.1   | 25.3   | 25.3   | 25.5   | 25.6   | 25.6   | 25.6   | 25.6   | 25.6     | 25.7   | 25.2     | 25.1   |
|                                    | Birth year                | 1969.5 | 1970.2 | 1970.9 | 1971.2 | 1971.3 | 1971.3 | 1971.4 | 1971.3 | 1971.3 | 1971.3 | 1971.5 | 1971.3 | 1971.4 | 1971.5 | 1971.5   | 1971.9 | 1971.7   | 1971.2 |
| Sibling group size % by birth year | 3.8                       | 3.7    | 3.6    | 3.5    | 3.4    | 3.4    | 3.4    | 3.4    | 3.4    | 3.4    | 3.4    | 3.4    | 3.4    | 3.4    | 3.4    | 3.4      | 3.4    | 3.5      |        |
| 1962-1964                          | 0.0                       | 5.8    | 6.2    | 10.9   | 7.3    | 7.7    | 8.0    | 14.3   | 14.3   | 13.3   | 8.0    | 0.0    | 18.8   | 0.0    | 0.0    | 20.0     | 11.6   | 8.4      |        |
| 1965-1969                          | 10.9                      | 9.6    | 9.3    | 9.6    | 9.6    | 9.7    | 9.8    | 9.4    | 9.4    | 8.8    | 9.1    | 8.9    | 9.9    | 9.1    | 9.6    | 9.6      | 9.9    | 9.5      |        |
| 1970-1974                          | 12.9                      | 11.1   | 9.8    | 10.9   | 10.0   | 10.3   | 9.9    | 11.7   | 11.7   | 9.9    | 10.8   | 10.0   | 10.0   | 9.6    | 11.3   | 10.3     | 10.4   | 10.4     |        |
| 1975-1979                          | 12.8                      | 14.2   | 12.8   | 12.6   | 12.6   | 13.3   | 13.2   | 13.0   | 13.0   | 14.1   | 13.0   | 13.0   | 14.8   | 13.0   | 13.7   | 12.3     | 13.4   | 13.1     |        |
| Mortality                          | (10 <sup>-3</sup> )       | 1.25   | 1.32   | 1.37   | 1.41   | 1.46   | 1.49   | 1.56   | 1.52   | 1.60   | 1.61   | 1.59   | 1.58   | 1.64   | 1.66   | 1.63     | 1.68   | 1.47     |        |
| Deaths                             | 624                       | 6,352  | 7,658  | 6,287  | 5,374  | 4,337  | 3,758  | 3,758  | 2,943  | 2,606  | 2,125  | 1,689  | 1,398  | 1,215  | 980    | 843      | 3,820  | 52,009   |        |
| Person-time                        | %                         | 1.4    | 13.6   | 15.9   | 12.6   | 10.4   | 8.2    | 6.8    | 5.5    | 4.6    | 3.7    | 3.0    | 2.5    | 2.1    | 1.7    | 1.5      | 6.4    | 100.0    |        |
| Sex                                | %                         | 49.5   | 47.3   | 46.5   | 46.7   | 47.2   | 46.3   | 45.9   | 45.3   | 43.4   | 45.6   | 44.4   | 46.5   | 45.4   | 45.2   | 46.4     | 45.8   | 46.3     |        |
| Birth order                        | Mean                      | 2.0    | 2.2    | 2.3    | 2.3    | 2.2    | 2.2    | 2.2    | 2.3    | 2.3    | 2.4    | 2.4    | 2.5    | 2.5    | 2.5    | 2.5      | 2.5    | 2.285    |        |
| Maternal age                       | Mean                      | 25.6   | 26.5   | 27.2   | 27.5   | 27.4   | 27.6   | 27.6   | 27.6   | 27.7   | 27.9   | 27.7   | 27.8   | 27.7   | 27.7   | 27.7     | 27.7   | 27.338   |        |
| Birth year                         | Mean                      | 1946.5 | 1945.8 | 1945.7 | 1945.8 | 1946.0 | 1946.0 | 1946.1 | 1946.3 | 1946.4 | 1946.4 | 1946.6 | 1946.7 | 1946.9 | 1946.9 | 1947.0   | 1947.1 | 1946.121 |        |
| Sibling group size                 | Mean                      | 4.9    | 4.8    | 4.7    | 4.5    | 4.4    | 4.2    | 4.1    | 4.1    | 4.0    | 4.0    | 3.9    | 3.9    | 3.9    | 3.8    | 3.8      | 3.7    | 4.346    |        |
| Rate by birth year                 | 1938-1940                 | 1.65   | 1.73   | 1.79   | 1.89   | 1.98   | 2.02   | 2.27   | 2.31   | 2.51   | 2.48   | 2.57   | 2.50   | 2.68   | 2.87   | 2.65     | 3.07   | 2.08     |        |
| 1941-1945                          | 1.31                      | 1.39   | 1.44   | 1.51   | 1.55   | 1.60   | 1.61   | 1.61   | 1.60   | 1.73   | 1.78   | 1.79   | 1.73   | 1.84   | 1.87   | 1.95     | 1.94   | 1.57     |        |
| 1946-1950                          | 1.32                      | 1.11   | 1.20   | 1.17   | 1.30   | 1.28   | 1.31   | 1.27   | 1.27   | 1.30   | 1.33   | 1.26   | 1.30   | 1.37   | 1.20   | 1.17     | 1.28   | 1.24     |        |
| 1951-1955                          | 0.87                      | 1.10   | 1.07   | 1.12   | 1.12   | 1.16   | 1.19   | 1.11   | 1.11   | 1.22   | 1.13   | 1.09   | 1.20   | 1.16   | 1.22   | 1.23     | 1.31   | 1.14     |        |
| 1956-1960                          | 0.85                      | 1.07   | 1.07   | 1.07   | 1.14   | 1.13   | 1.28   | 1.18   | 1.18   | 1.14   | 1.10   | 1.17   | 1.14   | 1.19   | 1.43   | 1.24     | 1.28   | 1.14     |        |

TABLE S6. Results: Relationship Between Preceding Birth Interval and Physical Fitness for Swedish Men Born 1962-1979. Estimates for Age at Conscription Test and Year of Conscription Test Not Shown.

|                           |             | Within-family |              |                | Between-family |              |                |
|---------------------------|-------------|---------------|--------------|----------------|----------------|--------------|----------------|
|                           |             | Beta          | SE           | 95% CI         | Beta           | SE           | 95% CI         |
| Preceding Interval Length | 9-12        | -0.013        | 0.047        | -0.105, 0.079  | -0.010         | 0.029        | -0.067, 0.047  |
|                           | 13-18       | -0.054        | 0.022        | -0.096, -0.011 | -0.015         | 0.013        | -0.041, 0.011  |
|                           | 19-24       | -0.054        | 0.019        | -0.092, -0.016 | -0.003         | 0.012        | -0.026, 0.020  |
|                           | 25-30 (ref) | 0.000         |              |                | 0.000          |              |                |
|                           | 31-36       | -0.061        | 0.020        | -0.100, -0.022 | -0.034         | 0.012        | -0.057, -0.011 |
|                           | 37-42       | -0.048        | 0.021        | -0.090, -0.006 | -0.058         | 0.012        | -0.082, -0.034 |
|                           | 43-48       | -0.061        | 0.023        | -0.106, -0.016 | -0.078         | 0.013        | -0.104, -0.052 |
|                           | 49-54       | -0.053        | 0.025        | -0.103, -0.004 | -0.083         | 0.015        | -0.112, -0.055 |
|                           | 55-60       | -0.041        | 0.028        | -0.095, 0.013  | -0.102         | 0.015        | -0.132, -0.071 |
|                           | 61-66       | -0.112        | 0.031        | -0.174, -0.051 | -0.109         | 0.017        | -0.143, -0.075 |
|                           | 67-72       | -0.067        | 0.036        | -0.137, 0.004  | -0.126         | 0.020        | -0.165, -0.087 |
|                           | 73-78       | -0.075        | 0.039        | -0.152, 0.002  | -0.140         | 0.021        | -0.182, -0.099 |
|                           | 79-84       | -0.073        | 0.044        | -0.160, 0.014  | -0.168         | 0.024        | -0.214, -0.121 |
|                           | 85-90       | -0.070        | 0.050        | -0.168, 0.028  | -0.177         | 0.026        | -0.228, -0.126 |
| Birth Order               | 91-96       | 0.011         | 0.058        | -0.102, 0.125  | -0.154         | 0.030        | -0.213, -0.095 |
|                           | 97+         | -0.040        | 0.044        | -0.126, 0.045  | -0.190         | 0.020        | -0.228, -0.151 |
|                           | 2 (ref)     | 0.000         |              |                | 0.000          |              |                |
|                           | 3           | -0.066        | 0.020        | -0.105, -0.026 | -0.116         | 0.007        | -0.131, -0.102 |
|                           | 4           | -0.056        | 0.039        | -0.133, 0.021  | -0.189         | 0.014        | -0.215, -0.162 |
|                           | 5           | -0.136        | 0.060        | -0.254, -0.018 | -0.264         | 0.025        | -0.312, -0.215 |
|                           | 6           | -0.189        | 0.083        | -0.352, -0.026 | -0.310         | 0.037        | -0.383, -0.236 |
| Maternal Age              | 7+          | -0.129        | 0.109        | -0.342, 0.084  | -0.291         | 0.048        | -0.385, -0.198 |
|                           | 15-19       | -0.099        | 0.065        | -0.227, 0.028  | -0.336         | 0.033        | -0.402, -0.271 |
|                           | 20-24       | 0.006         | 0.021        | -0.035, 0.048  | -0.157         | 0.009        | -0.174, -0.140 |
|                           | 25-29 (ref) | 0.000         |              |                | 0.000          |              |                |
|                           | 30-34       | 0.002         | 0.021        | -0.038, 0.043  | 0.102          | 0.008        | 0.085, 0.118   |
|                           | 35-39       | -0.029        | 0.040        | -0.106, 0.049  | 0.122          | 0.013        | 0.097, 0.147   |
|                           | 40-44       | -0.091        | 0.070        | -0.228, 0.047  | 0.098          | 0.026        | 0.047, 0.150   |
| Birth Year                | 45+         | 0.042         | 0.194        | -0.337, 0.421  | 0.057          | 0.109        | -0.156, 0.270  |
|                           | 1962        | -0.924        | 0.764        | -2.421, 0.574  | -0.338         | 0.208        | -0.747, 0.070  |
|                           | 1963        | -1.197        | 0.250        | -1.686, -0.707 | -0.804         | 0.134        | -1.067, -0.542 |
|                           | 1964        | -0.771        | 0.166        | -1.097, -0.445 | -0.472         | 0.093        | -0.655, -0.290 |
|                           | 1965        | -0.576        | 0.144        | -0.860, -0.293 | -0.354         | 0.083        | -0.517, -0.191 |
|                           | 1966        | -0.330        | 0.119        | -0.563, -0.096 | -0.205         | 0.071        | -0.344, -0.065 |
|                           | 1967        | -0.253        | 0.100        | -0.448, -0.057 | -0.170         | 0.060        | -0.288, -0.053 |
|                           | 1968        | -0.310        | 0.076        | -0.458, -0.161 | -0.253         | 0.046        | -0.343, -0.163 |
|                           | 1969        | -0.091        | 0.054        | -0.197, 0.014  | -0.133         | 0.034        | -0.200, -0.067 |
|                           | 1970 (ref)  | 0.000         |              |                | 0.000          |              |                |
|                           | 1971        | -0.072        | 0.049        | -0.168, 0.023  | -0.095         | 0.032        | -0.158, -0.032 |
|                           | 1972        | 0.014         | 0.068        | -0.119, 0.147  | -0.036         | 0.044        | -0.123, 0.051  |
|                           | 1973        | -0.017        | 0.085        | -0.183, 0.149  | -0.026         | 0.054        | -0.133, 0.080  |
|                           | 1974        | 0.006         | 0.101        | -0.191, 0.204  | -0.014         | 0.063        | -0.138, 0.109  |
|                           | 1975        | 0.199         | 0.116        | -0.028, 0.426  | 0.196          | 0.071        | 0.056, 0.336   |
| 1976                      | 0.344       | 0.133         | 0.084, 0.604 | 0.388          | 0.080          | 0.231, 0.545 |                |
| 1977                      | 0.527       | 0.156         | 0.222, 0.832 | 0.570          | 0.090          | 0.393, 0.746 |                |
| 1978                      | 0.683       | 0.181         | 0.328, 1.038 | 0.770          | 0.102          | 0.570, 0.970 |                |
| 1979                      | 0.841       | 0.225         | 0.400, 1.283 | 0.813          | 0.120          | 0.578, 1.048 |                |
| Sibling Group Size        | 3 (ref)     |               |              |                | 0.000          |              |                |
|                           | 4           |               |              |                | -0.038         | 0.009        | -0.056, -0.020 |
|                           | 5           |               |              |                | -0.100         | 0.017        | -0.133, -0.068 |
|                           | 6           |               |              |                | -0.105         | 0.027        | -0.157, -0.053 |
|                           | 7           |               |              |                | -0.154         | 0.034        | -0.221, -0.087 |
| N                         |             | 100,647       |              |                | 100,647        |              |                |

TABLE S7. Results: Relationship Between Subsequent Birth Interval and Physical Fitness for Swedish Men Born 1962-1979. Estimates for Age at Conscription Test and Year of Conscription Test Not Shown.

|                            |             | Within-family |               |                | Between-family |               |                |
|----------------------------|-------------|---------------|---------------|----------------|----------------|---------------|----------------|
|                            |             | Beta          | SE            | 95% CI         | Beta           | SE            | 95% CI         |
| Subsequent Interval Length | 9-12        | 0.016         | 0.046         | -0.074, 0.107  | -0.072         | 0.032         | -0.135, -0.008 |
|                            | 13-18       | 0.016         | 0.022         | -0.027, 0.058  | -0.020         | 0.014         | -0.047, 0.007  |
|                            | 19-24       | 0.014         | 0.018         | -0.022, 0.050  | 0.007          | 0.012         | -0.016, 0.030  |
|                            | 25-30 (ref) | 0.000         |               |                | 0.000          |               |                |
|                            | 31-36       | 0.001         | 0.018         | -0.035, 0.037  | -0.005         | 0.012         | -0.028, 0.018  |
|                            | 37-42       | 0.009         | 0.020         | -0.029, 0.048  | -0.016         | 0.012         | -0.040, 0.008  |
|                            | 43-48       | 0.008         | 0.022         | -0.034, 0.051  | -0.003         | 0.013         | -0.029, 0.023  |
|                            | 49-54       | 0.004         | 0.024         | -0.042, 0.051  | -0.009         | 0.014         | -0.037, 0.019  |
|                            | 55-60       | -0.008        | 0.025         | -0.058, 0.042  | -0.031         | 0.015         | -0.061, -0.001 |
|                            | 61-66       | 0.037         | 0.027         | -0.017, 0.091  | -0.007         | 0.017         | -0.040, 0.026  |
|                            | 67-72       | 0.018         | 0.031         | -0.042, 0.078  | -0.014         | 0.018         | -0.050, 0.022  |
|                            | 73-78       | 0.011         | 0.033         | -0.052, 0.075  | 0.007          | 0.020         | -0.031, 0.046  |
|                            | 79-84       | 0.036         | 0.035         | -0.033, 0.105  | 0.006          | 0.021         | -0.035, 0.048  |
|                            | 85-90       | 0.011         | 0.038         | -0.065, 0.086  | -0.037         | 0.023         | -0.082, 0.008  |
| Birth Order                | 91-96       | 0.021         | 0.041         | -0.059, 0.100  | -0.043         | 0.024         | -0.091, 0.004  |
|                            | 97+         | -0.001        | 0.024         | -0.048, 0.046  | -0.033         | 0.014         | -0.061, -0.005 |
|                            | 1           | 0.000         | 0.021         | -0.041, 0.041  | 0.069          | 0.007         | 0.055, 0.082   |
|                            | 2 (ref)     | 0.000         |               |                | 0.000          |               |                |
|                            | 3           | -0.024        | 0.024         | -0.072, 0.024  | -0.083         | 0.012         | -0.107, -0.059 |
|                            | 4           | 0.021         | 0.048         | -0.074, 0.116  | -0.161         | 0.024         | -0.208, -0.113 |
|                            | 5           | -0.072        | 0.078         | -0.225, 0.081  | -0.214         | 0.043         | -0.298, -0.130 |
| Maternal Age               | 6           | -0.074        | 0.113         | -0.297, 0.148  | -0.235         | 0.059         | -0.351, -0.119 |
|                            | 15-19       | -0.006        | 0.033         | -0.070, 0.059  | -0.256         | 0.013         | -0.282, -0.230 |
|                            | 20-24       | 0.009         | 0.017         | -0.024, 0.042  | -0.139         | 0.007         | -0.153, -0.125 |
|                            | 25-29 (ref) | 0.000         |               |                | 0.000          |               |                |
|                            | 30-34       | -0.002        | 0.022         | -0.046, 0.041  | 0.034          | 0.010         | 0.014, 0.055   |
|                            | 35-39       | 0.051         | 0.059         | -0.065, 0.166  | 0.001          | 0.024         | -0.045, 0.048  |
| Birth Year                 | 40-44       | 0.291         | 0.197         | -0.096, 0.678  | -0.054         | 0.083         | -0.217, 0.109  |
|                            | 45+         |               |               |                | -0.075         | 0.032         | -0.139, -0.012 |
|                            | 1962        | -0.272        | 0.824         | -1.886, 1.343  | -0.040         | 0.232         | -0.494, 0.415  |
|                            | 1963        | -1.312        | 0.260         | -1.822, -0.801 | -0.894         | 0.123         | -1.136, -0.652 |
|                            | 1964        | -0.677        | 0.157         | -0.984, -0.370 | -0.477         | 0.088         | -0.650, -0.303 |
|                            | 1965        | -0.727        | 0.133         | -0.987, -0.466 | -0.388         | 0.079         | -0.543, -0.233 |
|                            | 1966        | -0.432        | 0.108         | -0.644, -0.221 | -0.228         | 0.068         | -0.362, -0.094 |
|                            | 1967        | -0.337        | 0.086         | -0.506, -0.169 | -0.186         | 0.057         | -0.298, -0.074 |
|                            | 1968        | -0.436        | 0.066         | -0.566, -0.306 | -0.292         | 0.046         | -0.381, -0.203 |
|                            | 1969        | -0.190        | 0.047         | -0.282, -0.098 | -0.140         | 0.034         | -0.206, -0.074 |
|                            | 1970 (ref)  | 0.000         |               |                | 0.000          |               |                |
|                            | 1971        | -0.056        | 0.044         | -0.142, 0.030  | -0.108         | 0.031         | -0.169, -0.047 |
|                            | 1972        | 0.093         | 0.061         | -0.027, 0.212  | -0.011         | 0.043         | -0.095, 0.073  |
|                            | 1973        | 0.068         | 0.075         | -0.080, 0.215  | -0.007         | 0.052         | -0.108, 0.094  |
| 1974                       | 0.106       | 0.090         | -0.070, 0.283 | 0.015          | 0.061          | -0.103, 0.134 |                |
| 1975                       | 0.345       | 0.104         | 0.142, 0.548  | 0.189          | 0.069          | 0.055, 0.324  |                |
| 1976                       | 0.489       | 0.118         | 0.257, 0.721  | 0.418          | 0.076          | 0.269, 0.567  |                |
| 1977                       | 0.639       | 0.137         | 0.370, 0.908  | 0.623          | 0.085          | 0.456, 0.790  |                |
| 1978                       | 0.885       | 0.159         | 0.573, 1.198  | 0.862          | 0.096          | 0.673, 1.051  |                |
| 1979                       | 1.015       | 0.200         | 0.622, 1.407  | 0.914          | 0.113          | 0.693, 1.135  |                |
| Sibling Group Size         | 3 (ref)     |               |               |                | 0.000          |               |                |
|                            | 4           |               |               |                | -0.056         | 0.009         | -0.074, -0.038 |
|                            | 5           |               |               |                | -0.132         | 0.017         | -0.165, -0.100 |
|                            | 6           |               |               |                | -0.133         | 0.028         | -0.188, -0.079 |
|                            | 7           |               |               |                | -0.171         | 0.035         | -0.241, -0.102 |
| N                          |             | 105,942       |               |                | 105,942        |               |                |

TABLE S8. Results: Relationship Between Preceding Birth Interval and Height for Swedish Men Born 1962-1979. Estimates for Age at Conscription Test and Year of Conscription Test Not Shown.

|                           |              | Within-family |               |                | Between-family |                |                |                |
|---------------------------|--------------|---------------|---------------|----------------|----------------|----------------|----------------|----------------|
|                           |              | Beta          | SE            | 95% CI         | Beta           | SE             | 95% CI         |                |
| Preceding Interval Length | 9-12         | -0.033        | 0.038         | -0.107, 0.042  | -0.030         | 0.030          | -0.088, 0.028  |                |
|                           | 13-18        | -0.011        | 0.017         | -0.045, 0.024  | 0.006          | 0.013          | -0.020, 0.031  |                |
|                           | 19-24        | -0.004        | 0.016         | -0.034, 0.027  | 0.015          | 0.011          | -0.007, 0.037  |                |
|                           | 25-30 (ref)  | 0.000         |               |                | 0.000          |                |                |                |
|                           | 31-36        | -0.015        | 0.016         | -0.047, 0.016  | -0.016         | 0.011          | -0.038, 0.006  |                |
|                           | 37-42        | -0.018        | 0.017         | -0.052, 0.016  | -0.029         | 0.012          | -0.052, -0.005 |                |
|                           | 43-48        | -0.012        | 0.018         | -0.048, 0.024  | -0.035         | 0.013          | -0.060, -0.010 |                |
|                           | 49-54        | 0.020         | 0.020         | -0.020, 0.059  | -0.027         | 0.014          | -0.054, 0.001  |                |
|                           | 55-60        | 0.013         | 0.022         | -0.030, 0.057  | -0.051         | 0.015          | -0.080, -0.021 |                |
|                           | 61-66        | 0.016         | 0.025         | -0.033, 0.065  | -0.055         | 0.017          | -0.088, -0.022 |                |
|                           | 67-72        | 0.011         | 0.028         | -0.044, 0.067  | -0.024         | 0.019          | -0.061, 0.014  |                |
|                           | 73-78        | -0.009        | 0.031         | -0.069, 0.052  | -0.057         | 0.021          | -0.097, -0.016 |                |
|                           | 79-84        | -0.008        | 0.035         | -0.077, 0.061  | -0.092         | 0.023          | -0.137, -0.047 |                |
|                           | 85-90        | -0.011        | 0.039         | -0.088, 0.066  | -0.070         | 0.025          | -0.118, -0.022 |                |
| 91-96                     | 0.075        | 0.045         | -0.013, 0.163 | -0.026         | 0.029          | -0.082, 0.031  |                |                |
| 97+                       | 0.011        | 0.034         | -0.056, 0.077 | -0.112         | 0.018          | -0.148, -0.076 |                |                |
| Birth Order               | 2 (ref)      | 0.000         |               |                | 0.000          |                |                |                |
|                           | 3            | -0.048        | 0.016         | -0.079, -0.017 | -0.070         | 0.007          | -0.083, -0.057 |                |
|                           | 4            | -0.074        | 0.031         | -0.135, -0.013 | -0.140         | 0.013          | -0.166, -0.115 |                |
|                           | 5            | -0.108        | 0.048         | -0.202, -0.014 | -0.184         | 0.023          | -0.229, -0.138 |                |
|                           | 6            | -0.098        | 0.066         | -0.228, 0.032  | -0.225         | 0.036          | -0.295, -0.155 |                |
|                           | 7            | 0.031         | 0.087         | -0.139, 0.202  | -0.286         | 0.052          | -0.388, -0.185 |                |
|                           | Maternal Age | 15-19         | -0.025        | 0.053          | -0.128, 0.079  | -0.340         | 0.034          | -0.408, -0.273 |
| 20-24                     | 0.013        | 0.017         | -0.021, 0.046 | -0.142         | 0.008          | -0.158, -0.125 |                |                |
| 25-29 (ref)               | 0.000        |               |               | 0.000          |                |                |                |                |
| Maternal Age              | 30-34        | -0.009        | 0.017         | -0.041, 0.024  | 0.110          | 0.008          | 0.095, 0.126   |                |
|                           | 35-39        | -0.028        | 0.032         | -0.090, 0.034  | 0.156          | 0.013          | 0.131, 0.181   |                |
|                           | 40-44        | -0.064        | 0.056         | -0.173, 0.046  | 0.154          | 0.025          | 0.105, 0.203   |                |
|                           | 45+          | -0.064        | 0.152         | -0.363, 0.234  | 0.182          | 0.092          | 0.002, 0.362   |                |
|                           | Birth Year   | 1962          | 0.213         | 0.640          | -1.041, 1.467  | 0.654          | 0.352          | -0.037, 1.344  |
|                           |              | 1963          | -0.064        | 0.208          | -0.471, 0.344  | 0.298          | 0.152          | 0.001, 0.596   |
| 1964                      |              | -0.014        | 0.136         | -0.281, 0.253  | 0.447          | 0.094          | 0.263, 0.631   |                |
| 1965                      |              | 0.072         | 0.118         | -0.159, 0.304  | 0.423          | 0.082          | 0.262, 0.584   |                |
| 1966                      |              | 0.025         | 0.098         | -0.167, 0.217  | 0.318          | 0.069          | 0.182, 0.453   |                |
| 1967                      |              | 0.016         | 0.082         | -0.144, 0.176  | 0.275          | 0.059          | 0.160, 0.389   |                |
| 1968                      |              | -0.016        | 0.062         | -0.138, 0.106  | 0.225          | 0.045          | 0.136, 0.314   |                |
| 1969                      |              | -0.020        | 0.044         | -0.107, 0.067  | 0.108          | 0.034          | 0.041, 0.174   |                |
| 1970 (ref)                |              | 0.000         |               |                | 0.000          |                |                |                |
| 1971                      |              | 0.022         | 0.040         | -0.056, 0.100  | 0.010          | 0.031          | -0.052, 0.071  |                |
| 1972                      |              | -0.021        | 0.055         | -0.129, 0.087  | -0.118         | 0.042          | -0.202, -0.035 |                |
| 1973                      |              | -0.074        | 0.068         | -0.208, 0.060  | -0.204         | 0.052          | -0.306, -0.102 |                |
| 1974                      |              | -0.096        | 0.081         | -0.255, 0.063  | -0.273         | 0.060          | -0.391, -0.155 |                |
| 1975                      |              | -0.116        | 0.093         | -0.298, 0.066  | -0.338         | 0.068          | -0.471, -0.204 |                |
| 1976                      | -0.081       | 0.106         | -0.288, 0.127 | -0.330         | 0.076          | -0.479, -0.181 |                |                |
| 1977                      | -0.047       | 0.122         | -0.285, 0.192 | -0.367         | 0.085          | -0.533, -0.200 |                |                |
| 1978                      | 0.085        | 0.137         | -0.183, 0.353 | -0.275         | 0.093          | -0.457, -0.093 |                |                |
| 1979                      | 0.082        | 0.158         | -0.228, 0.392 | -0.309         | 0.104          | -0.512, -0.105 |                |                |
| Sibling Group Size        | 3 (ref)      |               |               |                | 0.000          |                |                |                |
|                           | 4            |               |               |                | -0.026         | 0.009          | -0.044, -0.008 |                |
|                           | 5            |               |               |                | -0.056         | 0.017          | -0.089, -0.024 |                |
|                           | 6            |               |               |                | -0.082         | 0.026          | -0.133, -0.031 |                |
|                           | 7            |               |               |                | -0.084         | 0.036          | -0.155, -0.013 |                |
| N                         |              | 107,510       |               |                | 107,510        |                |                |                |



TABLE S9. Results: Relationship Between Subsequent Birth Interval and Height for Swedish Men Born 1962-1979. Estimates for Age at Conscription Test and Year of Conscription Test Not Shown.

|                            |             | Within-family |               |               | Between-family |                |                |
|----------------------------|-------------|---------------|---------------|---------------|----------------|----------------|----------------|
|                            |             | Beta          | SE            | 95% CI        | Beta           | SE             | 95% CI         |
| Subsequent Interval Length | 9-12        | -0.062        | 0.038         | -0.136, 0.011 | -0.103         | 0.031          | -0.164, -0.041 |
|                            | 13-18       | -0.025        | 0.017         | -0.059, 0.009 | -0.022         | 0.014          | -0.049, 0.005  |
|                            | 19-24       | -0.007        | 0.015         | -0.036, 0.022 | 0.025          | 0.012          | 0.002, 0.048   |
|                            | 25-30 (ref) | 0.000         |               |               | 0.000          |                |                |
|                            | 31-36       | -0.011        | 0.015         | -0.039, 0.018 | -0.001         | 0.011          | -0.024, 0.021  |
|                            | 37-42       | -0.006        | 0.016         | -0.036, 0.025 | -0.012         | 0.012          | -0.036, 0.012  |
|                            | 43-48       | 0.017         | 0.017         | -0.017, 0.050 | -0.004         | 0.013          | -0.030, 0.021  |
|                            | 49-54       | 0.000         | 0.019         | -0.037, 0.037 | -0.011         | 0.014          | -0.038, 0.016  |
|                            | 55-60       | 0.003         | 0.020         | -0.036, 0.042 | -0.005         | 0.015          | -0.035, 0.024  |
|                            | 61-66       | -0.022        | 0.022         | -0.065, 0.020 | -0.021         | 0.016          | -0.052, 0.011  |
|                            | 67-72       | -0.029        | 0.024         | -0.076, 0.018 | -0.012         | 0.018          | -0.047, 0.023  |
|                            | 73-78       | -0.014        | 0.026         | -0.065, 0.036 | -0.026         | 0.019          | -0.064, 0.011  |
|                            | 79-84       | -0.050        | 0.028         | -0.105, 0.004 | -0.039         | 0.021          | -0.079, 0.001  |
|                            | 85-90       | -0.015        | 0.030         | -0.075, 0.044 | 0.001          | 0.022          | -0.042, 0.045  |
| 91-96                      | -0.018      | 0.032         | -0.081, 0.045 | -0.056        | 0.024          | -0.104, -0.009 |                |
| 97+                        | -0.020      | 0.019         | -0.057, 0.017 | -0.027        | 0.014          | -0.054, 0.000  |                |
| Birth Order                | 1           | 0.033         | 0.016         | 0.001, 0.065  | 0.055          | 0.007          | 0.042, 0.068   |
|                            | 2 (ref)     | 0.000         |               |               | 0.000          |                |                |
|                            | 3           | -0.024        | 0.019         | -0.061, 0.014 | -0.065         | 0.011          | -0.087, -0.042 |
|                            | 4           | -0.014        | 0.038         | -0.089, 0.061 | -0.151         | 0.023          | -0.197, -0.105 |
|                            | 5           | -0.088        | 0.061         | -0.207, 0.032 | -0.165         | 0.041          | -0.245, -0.084 |
|                            | 6           | -0.119        | 0.089         | -0.294, 0.056 | -0.273         | 0.061          | -0.393, -0.154 |
| Maternal Age               | 15-19       | 0.021         | 0.026         | -0.030, 0.072 | -0.240         | 0.013          | -0.266, -0.213 |
|                            | 20-24       | -0.006        | 0.014         | -0.033, 0.020 | -0.124         | 0.007          | -0.137, -0.110 |
|                            | 25-29 (ref) | 0.000         |               |               | 0.000          |                |                |
|                            | 30-34       | 0.025         | 0.017         | -0.009, 0.059 | 0.079          | 0.010          | 0.059, 0.099   |
|                            | 35-39       | 0.015         | 0.046         | -0.074, 0.105 | 0.068          | 0.024          | 0.022, 0.115   |
|                            | 40-44       | 0.028         | 0.153         | -0.272, 0.329 | 0.012          | 0.083          | -0.150, 0.175  |
| 45+                        |             |               |               | 0.200         | 0.034          | 0.134, 0.267   |                |
| Birth Year                 | 1962        | 0.219         | 0.687         | -1.127, 1.565 | 0.647          | 0.381          | -0.099, 1.393  |
|                            | 1963        | 0.112         | 0.215         | -0.310, 0.534 | 0.090          | 0.139          | -0.182, 0.362  |
|                            | 1964        | 0.211         | 0.129         | -0.041, 0.463 | 0.450          | 0.089          | 0.275, 0.625   |
|                            | 1965        | 0.180         | 0.109         | -0.034, 0.394 | 0.386          | 0.078          | 0.233, 0.540   |
|                            | 1966        | 0.111         | 0.089         | -0.063, 0.284 | 0.318          | 0.066          | 0.189, 0.448   |
|                            | 1967        | 0.140         | 0.071         | 0.002, 0.279  | 0.257          | 0.056          | 0.147, 0.367   |
|                            | 1968        | 0.052         | 0.055         | -0.055, 0.160 | 0.171          | 0.045          | 0.084, 0.258   |
|                            | 1969        | 0.003         | 0.039         | -0.073, 0.079 | 0.085          | 0.033          | 0.020, 0.151   |
|                            | 1970 (ref)  | 0.000         |               |               | 0.000          |                |                |
|                            | 1971        | 0.035         | 0.036         | -0.036, 0.106 | -0.047         | 0.031          | -0.107, 0.014  |
|                            | 1972        | -0.012        | 0.050         | -0.110, 0.086 | -0.132         | 0.042          | -0.213, -0.050 |
|                            | 1973        | -0.042        | 0.061         | -0.162, 0.078 | -0.196         | 0.050          | -0.295, -0.097 |
|                            | 1974        | -0.022        | 0.073         | -0.164, 0.121 | -0.246         | 0.059          | -0.362, -0.131 |
|                            | 1975        | -0.015        | 0.083         | -0.178, 0.147 | -0.325         | 0.067          | -0.457, -0.194 |
| 1976                       | 0.035       | 0.094         | -0.149, 0.219 | -0.286        | 0.074          | -0.431, -0.141 |                |
| 1977                       | 0.033       | 0.106         | -0.176, 0.242 | -0.320        | 0.082          | -0.480, -0.160 |                |
| 1978                       | 0.081       | 0.119         | -0.153, 0.314 | -0.226        | 0.089          | -0.400, -0.051 |                |
| 1979                       | 0.034       | 0.139         | -0.238, 0.307 | -0.245        | 0.100          | -0.441, -0.050 |                |
| Sibling Group Size         | 3 (ref)     |               |               |               | 0.000          |                |                |
|                            | 4           |               |               |               | -0.025         | 0.009          | -0.043, -0.007 |
|                            | 5           |               |               |               | -0.043         | 0.017          | -0.077, -0.009 |
|                            | 6           |               |               |               | -0.094         | 0.028          | -0.148, -0.040 |
|                            | 7           |               |               |               | -0.061         | 0.037          | -0.134, 0.013  |
| N                          |             | 113,250       |               |               | 113,250        |                |                |

TABLE S10. Results: Relationship Between Preceding Birth Interval and Being Overweight or Obese for Swedish Men Born 1962-1979. Estimates for Age at Conscription Test and Year of Conscription Test Not Shown.

|                           |              | Within-family |               |               | Between-family |              |                |
|---------------------------|--------------|---------------|---------------|---------------|----------------|--------------|----------------|
|                           |              | Beta          | SE            | 95% CI        | Beta           | SE           | 95% CI         |
| Preceding Interval Length | 9-12         | -0.015        | 0.017         | -0.048, 0.018 | -0.008         | 0.009        | -0.026, 0.010  |
|                           | 13-18        | -0.001        | 0.008         | -0.016, 0.014 | 0.002          | 0.004        | -0.006, 0.010  |
|                           | 19-24        | 0.004         | 0.007         | -0.010, 0.017 | 0.001          | 0.004        | -0.006, 0.008  |
|                           | 25-30 (ref)  | 0.000         |               |               | 0.000          |              |                |
|                           | 31-36        | 0.014         | 0.007         | 0.000, 0.028  | 0.012          | 0.004        | 0.005, 0.019   |
|                           | 37-42        | 0.014         | 0.008         | -0.001, 0.029 | 0.013          | 0.004        | 0.005, 0.020   |
|                           | 43-48        | 0.004         | 0.008         | -0.012, 0.020 | 0.016          | 0.004        | 0.008, 0.024   |
|                           | 49-54        | 0.000         | 0.009         | -0.017, 0.018 | 0.018          | 0.005        | 0.009, 0.027   |
|                           | 55-60        | 0.021         | 0.010         | 0.002, 0.040  | 0.033          | 0.005        | 0.023, 0.043   |
|                           | 61-66        | 0.017         | 0.011         | -0.005, 0.039 | 0.036          | 0.006        | 0.024, 0.047   |
|                           | 67-72        | 0.034         | 0.013         | 0.009, 0.059  | 0.042          | 0.007        | 0.029, 0.055   |
|                           | 73-78        | 0.027         | 0.014         | -0.001, 0.054 | 0.044          | 0.007        | 0.030, 0.059   |
|                           | 79-84        | 0.062         | 0.016         | 0.031, 0.093  | 0.057          | 0.008        | 0.040, 0.073   |
|                           | 85-90        | 0.020         | 0.018         | -0.015, 0.054 | 0.057          | 0.010        | 0.038, 0.076   |
| 91-96                     | 0.022        | 0.020         | -0.018, 0.062 | 0.075         | 0.011          | 0.052, 0.097 |                |
| 97+                       | 0.039        | 0.015         | 0.009, 0.068  | 0.084         | 0.007          | 0.070, 0.098 |                |
| Birth Order               | 2 (ref)      | 0.000         |               |               | 0.000          |              |                |
|                           | 3            | 0.007         | 0.007         | -0.007, 0.021 | 0.023          | 0.002        | 0.019, 0.028   |
|                           | 4            | 0.021         | 0.014         | -0.007, 0.048 | 0.050          | 0.005        | 0.041, 0.059   |
|                           | 5            | 0.017         | 0.021         | -0.025, 0.059 | 0.073          | 0.008        | 0.056, 0.089   |
|                           | 6            | 0.041         | 0.030         | -0.017, 0.099 | 0.090          | 0.013        | 0.064, 0.115   |
|                           | 7            | 0.001         | 0.039         | -0.075, 0.077 | 0.122          | 0.017        | 0.090, 0.154   |
|                           | Maternal Age | 15-19         | -0.011        | 0.024         | -0.058, 0.036  | 0.028        | 0.011          |
| 20-24                     | -0.006       | 0.008         | -0.021, 0.009 | 0.032         | 0.003          | 0.027, 0.038 |                |
| 25-29 (ref)               | 0.000        |               |               | 0.000         |                |              |                |
|                           | 30-34        | -0.003        | 0.007         | -0.017, 0.012 | -0.020         | 0.003        | -0.025, -0.015 |
|                           | 35-39        | -0.004        | 0.014         | -0.032, 0.024 | -0.026         | 0.004        | -0.034, -0.018 |
|                           | 40-44        | -0.034        | 0.025         | -0.082, 0.015 | -0.042         | 0.008        | -0.059, -0.025 |
|                           | 45+          | 0.101         | 0.070         | -0.035, 0.238 | -0.063         | 0.032        | -0.126, 0.000  |
| Birth Year                | 1962         | 0.015         | 0.272         | -0.519, 0.549 | -0.127         | 0.138        | -0.398, 0.145  |
|                           | 1963         | 0.052         | 0.094         | -0.133, 0.236 | -0.120         | 0.048        | -0.215, -0.025 |
|                           | 1964         | -0.015        | 0.060         | -0.132, 0.103 | -0.122         | 0.028        | -0.178, -0.067 |
|                           | 1965         | -0.020        | 0.052         | -0.122, 0.082 | -0.093         | 0.026        | -0.143, -0.043 |
|                           | 1966         | 0.002         | 0.043         | -0.083, 0.086 | -0.064         | 0.022        | -0.108, -0.021 |
|                           | 1967         | -0.023        | 0.036         | -0.094, 0.047 | -0.056         | 0.019        | -0.093, -0.020 |
|                           | 1968         | -0.019        | 0.027         | -0.073, 0.035 | -0.043         | 0.014        | -0.071, -0.015 |
|                           | 1969         | -0.020        | 0.019         | -0.058, 0.018 | -0.031         | 0.010        | -0.051, -0.011 |
|                           | 1970 (ref)   | 0.000         |               |               | 0.000          |              |                |
|                           | 1971         | 0.017         | 0.018         | -0.018, 0.051 | 0.031          | 0.010        | 0.012, 0.049   |
|                           | 1972         | 0.036         | 0.024         | -0.012, 0.084 | 0.054          | 0.013        | 0.027, 0.080   |
|                           | 1973         | 0.020         | 0.030         | -0.039, 0.080 | 0.059          | 0.017        | 0.027, 0.092   |
|                           | 1974         | 0.042         | 0.036         | -0.029, 0.112 | 0.080          | 0.020        | 0.042, 0.118   |
|                           | 1975         | 0.050         | 0.041         | -0.031, 0.130 | 0.098          | 0.022        | 0.054, 0.141   |
| 1976                      | 0.054        | 0.047         | -0.038, 0.146 | 0.098         | 0.025          | 0.049, 0.147 |                |
| 1977                      | 0.110        | 0.054         | 0.004, 0.217  | 0.107         | 0.028          | 0.052, 0.163 |                |
| 1978                      | 0.127        | 0.061         | 0.007, 0.248  | 0.106         | 0.031          | 0.044, 0.167 |                |
| 1979                      | 0.084        | 0.072         | -0.057, 0.226 | 0.110         | 0.036          | 0.040, 0.181 |                |
| Sibling Group Size        | 3 (ref)      |               |               |               | 0.000          |              |                |
|                           | 4            |               |               |               | -0.005         | 0.003        | -0.010, 0.001  |
|                           | 5            |               |               |               | -0.009         | 0.005        | -0.019, 0.001  |
|                           | 6            |               |               |               | -0.018         | 0.008        | -0.035, -0.002 |
|                           | 7            |               |               |               | -0.039         | 0.010        | -0.060, -0.019 |
| N                         |              | 102,000       |               |               | 102,000        |              |                |

TABLE S11. Results: Relationship Between Subsequent Birth Interval and Being Overweight or Obese for Swedish Men Born 1962-1979. Estimates for Age at Conscriptioin Test and Year of Conscriptioin Test Not Shown.

|                            |             | Within-family |               |               | Between-family |               |                |
|----------------------------|-------------|---------------|---------------|---------------|----------------|---------------|----------------|
|                            |             | Beta          | SE            | 95% CI        | Beta           | SE            | 95% CI         |
| Subsequent Interval Length | 9-12        | 0.014         | 0.016         | -0.018, 0.045 | 0.010          | 0.011         | -0.010, 0.031  |
|                            | 13-18       | -0.007        | 0.007         | -0.021, 0.008 | 0.005          | 0.004         | -0.004, 0.013  |
|                            | 19-24       | -0.008        | 0.006         | -0.021, 0.004 | -0.004         | 0.004         | -0.012, 0.003  |
|                            | 25-30 (ref) | 0.000         |               |               | 0.000          |               |                |
|                            | 31-36       | -0.004        | 0.006         | -0.016, 0.009 | -0.004         | 0.004         | -0.011, 0.003  |
|                            | 37-42       | -0.008        | 0.007         | -0.021, 0.006 | -0.001         | 0.004         | -0.009, 0.007  |
|                            | 43-48       | -0.001        | 0.007         | -0.015, 0.013 | -0.002         | 0.004         | -0.011, 0.006  |
|                            | 49-54       | 0.012         | 0.008         | -0.004, 0.028 | 0.002          | 0.005         | -0.007, 0.012  |
|                            | 55-60       | -0.008        | 0.009         | -0.025, 0.009 | -0.003         | 0.005         | -0.013, 0.006  |
|                            | 61-66       | 0.000         | 0.009         | -0.018, 0.019 | -0.002         | 0.005         | -0.013, 0.008  |
|                            | 67-72       | -0.014        | 0.010         | -0.034, 0.007 | -0.007         | 0.006         | -0.018, 0.005  |
|                            | 73-78       | 0.012         | 0.011         | -0.010, 0.033 | 0.004          | 0.006         | -0.009, 0.016  |
|                            | 79-84       | -0.009        | 0.012         | -0.032, 0.014 | -0.008         | 0.007         | -0.021, 0.005  |
|                            | 85-90       | 0.006         | 0.013         | -0.019, 0.032 | 0.002          | 0.007         | -0.012, 0.017  |
| Birth Order                | 91-96       | 0.010         | 0.014         | -0.017, 0.036 | -0.005         | 0.008         | -0.020, 0.011  |
|                            | 97+         | 0.000         | 0.008         | -0.016, 0.016 | -0.002         | 0.005         | -0.012, 0.007  |
|                            | 1           | 0.023         | 0.007         | 0.009, 0.037  | -0.006         | 0.002         | -0.010, -0.001 |
|                            | 2 (ref)     | 0.000         |               |               | 0.000          |               |                |
|                            | 3           | -0.004        | 0.008         | -0.020, 0.012 | 0.025          | 0.004         | 0.017, 0.033   |
|                            | 4           | -0.003        | 0.016         | -0.035, 0.029 | 0.040          | 0.008         | 0.024, 0.055   |
|                            | 5           | -0.018        | 0.026         | -0.069, 0.033 | 0.051          | 0.014         | 0.023, 0.078   |
| Maternal Age               | 6           | 0.005         | 0.038         | -0.069, 0.080 | 0.072          | 0.020         | 0.032, 0.111   |
|                            | 15-19       | 0.012         | 0.011         | -0.010, 0.034 | 0.065          | 0.005         | 0.056, 0.074   |
|                            | 20-24       | 0.007         | 0.006         | -0.004, 0.018 | 0.030          | 0.002         | 0.026, 0.034   |
|                            | 25-29       | 0.000         |               |               | 0.000          |               |                |
|                            | 30-34       | -0.007        | 0.007         | -0.021, 0.008 | -0.007         | 0.003         | -0.013, -0.001 |
|                            | 35-39       | -0.029        | 0.020         | -0.067, 0.010 | 0.004          | 0.008         | -0.011, 0.019  |
|                            | 40-44       | -0.019        | 0.065         | -0.145, 0.108 | 0.017          | 0.030         | -0.041, 0.075  |
| Birth Year                 | 45+         |               |               |               | -0.085         | 0.006         | -0.097, -0.074 |
|                            | 1962        | -0.071        | 0.279         | -0.619, 0.476 | -0.024         | 0.157         | -0.332, 0.284  |
|                            | 1963        | -0.093        | 0.091         | -0.270, 0.085 | -0.035         | 0.045         | -0.123, 0.053  |
|                            | 1964        | -0.023        | 0.054         | -0.128, 0.083 | -0.053         | 0.027         | -0.106, 0.001  |
|                            | 1965        | -0.002        | 0.046         | -0.091, 0.087 | -0.026         | 0.025         | -0.075, 0.023  |
|                            | 1966        | 0.017         | 0.037         | -0.056, 0.089 | -0.021         | 0.021         | -0.063, 0.021  |
|                            | 1967        | 0.017         | 0.030         | -0.041, 0.075 | -0.009         | 0.018         | -0.045, 0.027  |
|                            | 1968        | 0.016         | 0.023         | -0.029, 0.061 | -0.008         | 0.014         | -0.036, 0.020  |
|                            | 1969        | 0.030         | 0.016         | -0.002, 0.062 | 0.010          | 0.011         | -0.012, 0.031  |
|                            | 1970 (ref)  | 0.000         |               |               | 0.000          |               |                |
|                            | 1971        | 0.002         | 0.015         | -0.027, 0.032 | 0.016          | 0.009         | -0.002, 0.035  |
|                            | 1972        | 0.010         | 0.021         | -0.031, 0.052 | 0.025          | 0.013         | -0.001, 0.051  |
|                            | 1973        | 0.021         | 0.026         | -0.030, 0.072 | 0.044          | 0.016         | 0.013, 0.075   |
|                            | 1974        | 0.035         | 0.031         | -0.025, 0.095 | 0.065          | 0.019         | 0.028, 0.101   |
|                            | 1975        | 0.053         | 0.035         | -0.015, 0.122 | 0.081          | 0.021         | 0.040, 0.122   |
| 1976                       | 0.055       | 0.040         | -0.022, 0.133 | 0.067         | 0.024          | 0.020, 0.113  |                |
| 1977                       | 0.059       | 0.045         | -0.030, 0.148 | 0.071         | 0.027          | 0.018, 0.123  |                |
| 1978                       | 0.060       | 0.051         | -0.040, 0.160 | 0.069         | 0.029          | 0.012, 0.127  |                |
| 1979                       | 0.064       | 0.060         | -0.054, 0.181 | 0.053         | 0.034          | -0.013, 0.119 |                |
| Sibling Group Size         | 3 (ref)     |               |               |               | 0.000          |               |                |
|                            | 4           |               |               |               | -0.004         | 0.003         | -0.010, 0.001  |
|                            | 5           |               |               |               | -0.004         | 0.005         | -0.014, 0.006  |
|                            | 6           |               |               |               | -0.004         | 0.009         | -0.021, 0.014  |
|                            | 7           |               |               |               | -0.033         | 0.010         | -0.053, -0.013 |
| N                          |             | 108,024       |               |               | 108,024        |               |                |

TABLE S12. Results: Relationship Between Preceding Birth Interval and Being Underweight or Severely Underweight for Swedish Men Born 1962-1979. Estimates for Age at Conscription Test and Year of Conscription Test Not Shown.

|                           |             | Within-family |               |               | Between-family |               |                |
|---------------------------|-------------|---------------|---------------|---------------|----------------|---------------|----------------|
|                           |             | Beta          | SE            | 95% CI        | Beta           | SE            | 95% CI         |
| Preceding Interval Length | 9-12        | -0.015        | 0.014         | -0.042, 0.012 | -0.007         | 0.008         | -0.021, 0.008  |
|                           | 13-18       | -0.006        | 0.006         | -0.018, 0.007 | 0.005          | 0.004         | -0.002, 0.012  |
|                           | 19-24       | -0.003        | 0.006         | -0.014, 0.008 | -0.004         | 0.003         | -0.009, 0.002  |
|                           | 25-30 (ref) | 0.000         |               |               | 0.000          |               |                |
|                           | 31-36       | -0.001        | 0.006         | -0.013, 0.010 | 0.001          | 0.003         | -0.005, 0.007  |
|                           | 37-42       | 0.003         | 0.006         | -0.010, 0.015 | 0.003          | 0.003         | -0.004, 0.009  |
|                           | 43-48       | -0.001        | 0.007         | -0.014, 0.012 | -0.005         | 0.003         | -0.011, 0.002  |
|                           | 49-54       | 0.000         | 0.007         | -0.015, 0.014 | 0.004          | 0.004         | -0.004, 0.011  |
|                           | 55-60       | 0.010         | 0.008         | -0.006, 0.025 | -0.002         | 0.004         | -0.010, 0.006  |
|                           | 61-66       | -0.005        | 0.009         | -0.023, 0.013 | -0.011         | 0.004         | -0.020, -0.003 |
|                           | 67-72       | 0.004         | 0.010         | -0.017, 0.024 | 0.003          | 0.005         | -0.007, 0.013  |
|                           | 73-78       | 0.015         | 0.011         | -0.008, 0.037 | 0.009          | 0.006         | -0.003, 0.020  |
|                           | 79-84       | 0.017         | 0.013         | -0.008, 0.042 | -0.003         | 0.006         | -0.015, 0.009  |
|                           | 85-90       | 0.003         | 0.014         | -0.026, 0.031 | -0.009         | 0.007         | -0.022, 0.004  |
| Birth Order               | 91-96       | 0.004         | 0.017         | -0.028, 0.037 | -0.025         | 0.007         | -0.038, -0.012 |
|                           | 97+         | 0.003         | 0.013         | -0.021, 0.028 | -0.011         | 0.005         | -0.020, -0.002 |
|                           | 2 (ref)     | 0.000         |               |               | 0.000          |               |                |
|                           | 3           | 0.010         | 0.006         | -0.002, 0.021 | -0.002         | 0.002         | -0.006, 0.002  |
|                           | 4           | 0.006         | 0.011         | -0.016, 0.028 | -0.008         | 0.004         | -0.015, -0.001 |
|                           | 5           | -0.004        | 0.018         | -0.038, 0.031 | -0.025         | 0.007         | -0.038, -0.012 |
|                           | 6           | 0.003         | 0.024         | -0.044, 0.051 | -0.032         | 0.011         | -0.054, -0.011 |
| Maternal Age              | 7           | 0.000         | 0.032         | -0.063, 0.062 | -0.054         | 0.014         | -0.081, -0.026 |
|                           | 15-19       | 0.000         | 0.019         | -0.038, 0.038 | -0.013         | 0.009         | -0.030, 0.005  |
|                           | 20-24       | -0.005        | 0.006         | -0.017, 0.007 | -0.005         | 0.002         | -0.009, 0.000  |
|                           | 25-29 (ref) | 0.000         |               |               | 0.000          |               |                |
|                           | 30-34       | 0.006         | 0.006         | -0.005, 0.018 | 0.003          | 0.002         | -0.001, 0.008  |
|                           | 35-39       | 0.021         | 0.012         | -0.002, 0.044 | 0.013          | 0.003         | 0.006, 0.019   |
| Birth Year                | 40-44       | 0.070         | 0.020         | 0.031, 0.110  | 0.026          | 0.007         | 0.012, 0.040   |
|                           | 45+         | 0.083         | 0.057         | -0.029, 0.195 | 0.006          | 0.024         | -0.042, 0.054  |
|                           | 1962        | 0.000         | 0.223         | -0.437, 0.438 | -0.080         | 0.028         | -0.135, -0.026 |
|                           | 1963        | -0.052        | 0.077         | -0.203, 0.099 | 0.009          | 0.039         | -0.067, 0.084  |
|                           | 1964        | -0.057        | 0.049         | -0.153, 0.040 | -0.016         | 0.024         | -0.063, 0.030  |
|                           | 1965        | -0.021        | 0.043         | -0.105, 0.062 | -0.012         | 0.021         | -0.053, 0.029  |
|                           | 1966        | -0.026        | 0.035         | -0.095, 0.043 | -0.010         | 0.018         | -0.045, 0.025  |
|                           | 1967        | -0.034        | 0.029         | -0.092, 0.024 | -0.016         | 0.015         | -0.045, 0.014  |
|                           | 1968        | -0.038        | 0.022         | -0.082, 0.006 | -0.008         | 0.012         | -0.031, 0.015  |
|                           | 1969        | -0.008        | 0.016         | -0.039, 0.023 | 0.001          | 0.009         | -0.016, 0.019  |
|                           | 1970 (ref)  | 0.000         |               |               | 0.000          |               |                |
|                           | 1971        | 0.009         | 0.014         | -0.019, 0.037 | 0.009          | 0.008         | -0.007, 0.024  |
|                           | 1972        | 0.003         | 0.020         | -0.036, 0.043 | 0.020          | 0.011         | 0.000, 0.041   |
|                           | 1973        | 0.010         | 0.025         | -0.039, 0.058 | 0.022          | 0.013         | -0.003, 0.047  |
|                           | 1974        | 0.011         | 0.029         | -0.047, 0.068 | 0.012          | 0.015         | -0.017, 0.042  |
| 1975                      | 0.019       | 0.034         | -0.047, 0.085 | 0.009         | 0.017          | -0.024, 0.042 |                |
| Sibling Group Size        | 1976        | 0.018         | 0.039         | -0.058, 0.093 | 0.002          | 0.019         | -0.034, 0.039  |
|                           | 1977        | 0.001         | 0.044         | -0.086, 0.088 | 0.001          | 0.021         | -0.040, 0.042  |
|                           | 1978        | 0.013         | 0.050         | -0.086, 0.112 | 0.016          | 0.023         | -0.028, 0.060  |
|                           | 1979        | 0.031         | 0.059         | -0.085, 0.147 | 0.031          | 0.025         | -0.019, 0.080  |
|                           | 3 (ref)     |               |               |               | 0.000          |               |                |
|                           | 4           |               |               |               | 0.001          | 0.002         | -0.003, 0.006  |
|                           | 5           |               |               |               | 0.020          | 0.004         | 0.012, 0.029   |
| 6                         |             |               |               | 0.022         | 0.007          | 0.008, 0.036  |                |
| 7                         |             |               |               | 0.048         | 0.010          | 0.027, 0.068  |                |
| N                         |             | 102,000       |               |               | 102,000        |               |                |

TABLE S13. Results: Relationship Between Subsequent Birth Interval and Being Underweight or Severely Underweight for Swedish Men Born 1962-1979. Estimates for Age at Conscription Test and Year of Conscription Test Not Shown.

|                            |             | Within-family |               |                | Between-family |               |                |
|----------------------------|-------------|---------------|---------------|----------------|----------------|---------------|----------------|
|                            |             | Beta          | SE            | 95% CI         | Beta           | SE            | 95% CI         |
| Subsequent Interval Length | 9-12        | 0.010         | 0.014         | -0.017, 0.036  | -0.006         | 0.008         | -0.022, 0.011  |
|                            | 13-18       | -0.003        | 0.006         | -0.015, 0.009  | -0.001         | 0.004         | -0.008, 0.006  |
|                            | 19-24       | 0.004         | 0.005         | -0.006, 0.014  | 0.002          | 0.003         | -0.005, 0.008  |
|                            | 25-30 (ref) | 0.000         |               |                | 0.000          |               |                |
|                            | 31-36       | -0.005        | 0.005         | -0.015, 0.006  | 0.000          | 0.003         | -0.006, 0.006  |
|                            | 37-42       | -0.001        | 0.006         | -0.013, 0.010  | 0.004          | 0.003         | -0.003, 0.010  |
|                            | 43-48       | -0.006        | 0.006         | -0.018, 0.007  | 0.004          | 0.004         | -0.003, 0.011  |
|                            | 49-54       | -0.011        | 0.007         | -0.024, 0.002  | 0.002          | 0.004         | -0.005, 0.009  |
|                            | 55-60       | -0.006        | 0.007         | -0.020, 0.009  | 0.002          | 0.004         | -0.006, 0.010  |
|                            | 61-66       | -0.011        | 0.008         | -0.026, 0.005  | 0.001          | 0.004         | -0.008, 0.009  |
|                            | 67-72       | -0.005        | 0.009         | -0.023, 0.012  | -0.001         | 0.005         | -0.010, 0.008  |
|                            | 73-78       | -0.015        | 0.009         | -0.034, 0.003  | -0.006         | 0.005         | -0.016, 0.003  |
|                            | 79-84       | -0.008        | 0.010         | -0.028, 0.012  | -0.001         | 0.005         | -0.011, 0.010  |
|                            | 85-90       | 0.003         | 0.011         | -0.019, 0.025  | 0.007          | 0.006         | -0.005, 0.019  |
|                            | 91-96       | -0.010        | 0.012         | -0.032, 0.013  | -0.002         | 0.006         | -0.014, 0.010  |
| 97+                        | -0.010      | 0.007         | -0.024, 0.003 | -0.004         | 0.004          | -0.011, 0.003 |                |
| Birth Order                | 1           | -0.013        | 0.006         | -0.025, -0.002 | 0.007          | 0.002         | 0.003, 0.011   |
|                            | 2 (ref)     | 0.000         |               |                | 0.000          |               |                |
|                            | 3           | 0.023         | 0.007         | 0.009, 0.036   | 0.004          | 0.003         | -0.003, 0.011  |
|                            | 4           | 0.031         | 0.014         | 0.004, 0.058   | 0.007          | 0.007         | -0.006, 0.021  |
|                            | 5           | 0.031         | 0.022         | -0.012, 0.075  | -0.008         | 0.011         | -0.031, 0.014  |
|                            | 6           | 0.056         | 0.032         | -0.007, 0.120  | -0.017         | 0.018         | -0.052, 0.019  |
| Maternal Age               | 15-19       | 0.005         | 0.010         | -0.014, 0.024  | -0.008         | 0.003         | -0.015, -0.002 |
|                            | 20-24       | 0.003         | 0.005         | -0.007, 0.012  | -0.002         | 0.002         | -0.005, 0.002  |
|                            | 25-29 (ref) | 0.000         |               |                | 0.000          |               |                |
|                            | 30-34       | -0.004        | 0.006         | -0.016, 0.009  | 0.005          | 0.003         | -0.001, 0.010  |
|                            | 35-39       | -0.016        | 0.017         | -0.049, 0.016  | 0.004          | 0.007         | -0.009, 0.017  |
|                            | 40-44       | 0.082         | 0.055         | -0.026, 0.190  | 0.036          | 0.028         | -0.019, 0.090  |
| Birth Year                 | 45+         |               |               |                | -0.072         | 0.003         | -0.078, -0.065 |
|                            | 1962        | 0.066         | 0.239         | -0.402, 0.535  | -0.052         | 0.026         | -0.104, -0.001 |
|                            | 1963        | -0.046        | 0.078         | -0.198, 0.106  | 0.023          | 0.034         | -0.044, 0.090  |
|                            | 1964        | 0.013         | 0.046         | -0.077, 0.103  | 0.011          | 0.023         | -0.034, 0.056  |
|                            | 1965        | 0.012         | 0.039         | -0.064, 0.089  | -0.002         | 0.020         | -0.041, 0.037  |
|                            | 1966        | 0.026         | 0.032         | -0.036, 0.088  | 0.007          | 0.018         | -0.027, 0.042  |
|                            | 1967        | 0.019         | 0.025         | -0.031, 0.068  | 0.000          | 0.015         | -0.029, 0.029  |
|                            | 1968        | 0.017         | 0.020         | -0.021, 0.055  | 0.003          | 0.012         | -0.020, 0.026  |
|                            | 1969        | 0.024         | 0.014         | -0.003, 0.051  | 0.013          | 0.009         | -0.005, 0.031  |
|                            | 1970 (ref)  | 0.000         |               |                | 0.000          |               |                |
|                            | 1971        | 0.005         | 0.013         | -0.021, 0.030  | 0.016          | 0.007         | 0.001, 0.030   |
|                            | 1972        | -0.011        | 0.018         | -0.047, 0.024  | 0.017          | 0.010         | -0.003, 0.038  |
|                            | 1973        | -0.019        | 0.022         | -0.062, 0.025  | 0.029          | 0.012         | 0.005, 0.053   |
|                            | 1974        | -0.025        | 0.026         | -0.077, 0.026  | 0.023          | 0.015         | -0.006, 0.051  |
|                            | 1975        | -0.028        | 0.030         | -0.087, 0.031  | 0.011          | 0.017         | -0.022, 0.043  |
| 1976                       | -0.030      | 0.034         | -0.097, 0.036 | 0.015          | 0.018          | -0.021, 0.051 |                |
| 1977                       | -0.026      | 0.039         | -0.102, 0.050 | 0.009          | 0.020          | -0.030, 0.049 |                |
| 1978                       | -0.036      | 0.044         | -0.122, 0.049 | 0.015          | 0.022          | -0.028, 0.058 |                |
| 1979                       | -0.057      | 0.051         | -0.157, 0.044 | 0.038          | 0.025          | -0.010, 0.086 |                |
| Sibling Group Size         | 3 (ref)     |               |               |                | 0.000          |               |                |
|                            | 4           |               |               |                | -0.001         | 0.002         | -0.005, 0.004  |
|                            | 5           |               |               |                | 0.012          | 0.004         | 0.004, 0.021   |
|                            | 6           |               |               |                | 0.007          | 0.007         | -0.006, 0.021  |
|                            | 7           |               |               |                | 0.029          | 0.010         | 0.009, 0.049   |
| N                          |             | 108,024       |               |                | 108,024        |               |                |

TABLE S14. Results: Relationship Between Preceding Birth Interval and Mortality for Swedish Men and Women Born 1938-1960.

|                           |                 | Within-family |           |           | Between-family |           |           |
|---------------------------|-----------------|---------------|-----------|-----------|----------------|-----------|-----------|
|                           |                 | RR            | SE        | 95% CI    | RR             | SE        | 95% CI    |
| Preceding Interval Length | 9-12            | 1.01          | 0.06      | 0.90-1.14 | 0.97           | 0.04      | 0.89-1.05 |
|                           | 13-18           | 0.96          | 0.03      | 0.91-1.02 | 0.94           | 0.02      | 0.91-0.98 |
|                           | 19-24           | 0.97          | 0.03      | 0.92-1.02 | 0.95           | 0.02      | 0.92-0.98 |
|                           | 25-30 (ref)     | 1.00          |           |           | 1.00           |           |           |
|                           | 31-36           | 0.95          | 0.03      | 0.90-1.01 | 0.98           | 0.02      | 0.95-1.02 |
|                           | 37-42           | 0.99          | 0.03      | 0.93-1.05 | 1.00           | 0.02      | 0.96-1.04 |
|                           | 43-48           | 1.01          | 0.03      | 0.95-1.08 | 0.98           | 0.02      | 0.94-1.02 |
|                           | 49-54           | 1.04          | 0.04      | 0.96-1.11 | 1.01           | 0.02      | 0.97-1.06 |
|                           | 55-60           | 0.93          | 0.04      | 0.86-1.01 | 0.94           | 0.03      | 0.89-0.99 |
|                           | 61-66           | 0.99          | 0.04      | 0.91-1.08 | 1.00           | 0.03      | 0.94-1.05 |
|                           | 67-72           | 1.01          | 0.05      | 0.92-1.11 | 0.99           | 0.03      | 0.94-1.05 |
|                           | 73-78           | 0.94          | 0.05      | 0.84-1.04 | 0.97           | 0.03      | 0.91-1.04 |
|                           | 79-84           | 0.91          | 0.06      | 0.81-1.02 | 0.98           | 0.04      | 0.91-1.05 |
|                           | 85-90           | 0.89          | 0.07      | 0.78-1.02 | 0.93           | 0.04      | 0.85-1.01 |
| 91-96                     | 0.96            | 0.08          | 0.82-1.11 | 0.90      | 0.05           | 0.82-0.98 |           |
| 97+                       | 0.94            | 0.05          | 0.85-1.04 | 0.85      | 0.03           | 0.80-0.90 |           |
| Gender                    | Men (ref)       | 1.00          | 0.00      | 1.00-1.00 | 1.00           | 0.00      | 1.00-1.00 |
|                           | Women           | 0.65          | 0.01      | 0.63-0.67 | 0.68           | 0.01      | 0.67-0.70 |
| Birth Order               | 2 (ref)         | 1.00          | 0.00      | 1.00-1.00 | 1.00           | 0.00      | 1.00-1.00 |
|                           | 3               | 1.03          | 0.02      | 0.99-1.07 | 0.91           | 0.01      | 0.89-0.93 |
|                           | 4               | 0.98          | 0.03      | 0.92-1.05 | 0.83           | 0.02      | 0.80-0.86 |
|                           | 5               | 1.00          | 0.05      | 0.91-1.10 | 0.82           | 0.03      | 0.78-0.86 |
|                           | 6               | 1.01          | 0.06      | 0.89-1.14 | 0.80           | 0.04      | 0.74-0.87 |
|                           | 7               | 1.04          | 0.08      | 0.89-1.21 | 0.73           | 0.04      | 0.67-0.80 |
|                           | Maternal Age    | 15-19         | 1.08      | 0.11      | 0.87-1.33      | 1.16      | 0.06      |
| 20-24                     | 1.01            | 0.03          | 0.95-1.07 | 1.04      | 0.01           | 1.01-1.07 |           |
| 25-29 (ref)               | 1.00            | 0.00          | 1.00-1.00 | 1.00      | 0.00           | 1.00-1.00 |           |
| 30-34                     | 0.97            | 0.03          | 0.92-1.03 | 0.96      | 0.01           | 0.94-0.99 |           |
| 35-39                     | 0.97            | 0.04          | 0.89-1.06 | 0.95      | 0.01           | 0.93-0.98 |           |
| 40-44                     | 1.07            | 0.07          | 0.94-1.21 | 1.01      | 0.02           | 0.97-1.05 |           |
| 45+                       | 1.03            | 0.13          | 0.81-1.33 | 0.98      | 0.07           | 0.85-1.12 |           |
| Cohort                    | 1938-1940       | 1.03          | 0.04      | 0.94-1.12 | 0.88           | 0.02      | 0.85-0.91 |
|                           | 1941-1945       | 1.03          | 0.03      | 0.98-1.09 | 0.89           | 0.01      | 0.87-0.92 |
|                           | 1946-1950 (ref) | 1.00          | 0.00      | 1.00-1.00 | 1.00           | 0.00      | 1.00-1.00 |
|                           | 1951-1955       | 0.98          | 0.03      | 0.93-1.04 | 1.26           | 0.02      | 1.22-1.30 |
|                           | 1956-1960       | 0.92          | 0.05      | 0.83-1.01 | 1.75           | 0.02      | 1.68-1.82 |
| Sibling Group Size        | 3 (ref)         |               |           |           | 1.00           | 0.00      | 1.00-1.00 |
|                           | 4               |               |           |           | 0.83           | 0.01      | 0.81-0.84 |
|                           | 5               |               |           |           | 0.72           | 0.01      | 0.70-0.74 |
|                           | 6               |               |           |           | 0.64           | 0.02      | 0.62-0.66 |
|                           | 7               |               |           |           | 0.55           | 0.02      | 0.53-0.58 |
| N                         |                 | 159,554       |           |           | 159,554        |           |           |

TABLE S15. Results: Relationship Between Subsequent Birth Interval and Mortality for Swedish Men and Women Born 1938-1960.

|                            |                 | Within-family |         |           | Between-family |         |           |
|----------------------------|-----------------|---------------|---------|-----------|----------------|---------|-----------|
|                            |                 | RR            | SE      | 95% CI    | RR             | SE      | 95% CI    |
| Subsequent Interval Length | 9-12            | 1.02          | 0.06    | 0.91-1.14 | 0.92           | 0.04    | 0.85-1.00 |
|                            | 13-18           | 1.03          | 0.03    | 0.98-1.08 | 0.95           | 0.02    | 0.92-0.99 |
|                            | 19-24           | 1.03          | 0.03    | 0.98-1.08 | 0.98           | 0.02    | 0.95-1.02 |
|                            | 25-30 (ref)     | 1.00          | 0.00    | 1.00-1.00 | 1.00           | 0.00    | 1.00-1.00 |
|                            | 31-36           | 1.00          | 0.03    | 0.95-1.06 | 1.02           | 0.02    | 0.99-1.06 |
|                            | 37-42           | 1.02          | 0.03    | 0.96-1.09 | 1.03           | 0.02    | 0.99-1.07 |
|                            | 43-48           | 1.03          | 0.03    | 0.97-1.10 | 1.07           | 0.02    | 1.03-1.12 |
|                            | 49-54           | 0.98          | 0.04    | 0.91-1.05 | 1.05           | 0.02    | 1.00-1.09 |
|                            | 55-60           | 1.03          | 0.04    | 0.95-1.10 | 1.12           | 0.02    | 1.07-1.17 |
|                            | 61-66           | 1.00          | 0.04    | 0.93-1.09 | 1.13           | 0.03    | 1.08-1.19 |
|                            | 67-72           | 0.91          | 0.05    | 0.84-1.00 | 1.11           | 0.03    | 1.05-1.17 |
|                            | 73-78           | 0.96          | 0.05    | 0.88-1.06 | 1.13           | 0.03    | 1.06-1.19 |
|                            | 79-84           | 1.08          | 0.05    | 0.98-1.20 | 1.17           | 0.03    | 1.10-1.24 |
|                            | 85-90           | 1.09          | 0.06    | 0.98-1.23 | 1.18           | 0.03    | 1.11-1.27 |
| Gender                     | 91-96           | 1.07          | 0.06    | 0.95-1.21 | 1.17           | 0.04    | 1.09-1.25 |
|                            | 97+             | 1.05          | 0.03    | 0.98-1.12 | 1.22           | 0.02    | 1.17-1.27 |
| Birth Order                | Men (ref)       | 1.00          | 0.00    | 1.00-1.00 | 1.00           | 0.00    | 1.00-1.00 |
|                            | Women           | 0.64          | 0.01    | 0.62-0.66 | 0.69           | 0.01    | 0.68-0.70 |
| Maternal Age               | 1               | 1.01          | 0.02    | 0.97-1.05 | 1.15           | 0.01    | 1.12-1.18 |
|                            | 2 (ref)         | 1.00          | 0.00    | 1.00-1.00 | 1.00           | 0.00    | 1.00-1.00 |
|                            | 3               | 1.03          | 0.02    | 0.99-1.07 | 0.92           | 0.02    | 0.89-0.95 |
|                            | 4               | 1.00          | 0.04    | 0.93-1.07 | 0.81           | 0.02    | 0.78-0.85 |
|                            | 5               | 1.05          | 0.05    | 0.94-1.16 | 0.77           | 0.03    | 0.72-0.83 |
|                            | 6               | 1.07          | 0.07    | 0.93-1.23 | 0.72           | 0.05    | 0.65-0.80 |
| Cohort                     | 15-19           | 0.97          | 0.05    | 0.88-1.07 | 1.11           | 0.02    | 1.06-1.15 |
|                            | 20-24           | 0.99          | 0.02    | 0.94-1.04 | 1.05           | 0.01    | 1.03-1.07 |
|                            | 25-29 (ref)     | 1.00          | 0.00    | 1.00-1.00 | 1.00           | 0.00    | 1.00-1.00 |
|                            | 30-34           | 0.97          | 0.03    | 0.92-1.02 | 0.98           | 0.01    | 0.96-1.01 |
|                            | 35-39           | 0.97          | 0.05    | 0.89-1.07 | 1.01           | 0.02    | 0.97-1.04 |
|                            | 40-44           | 1.23          | 0.10    | 1.02-1.49 | 1.19           | 0.04    | 1.11-1.29 |
| Sibling Group Size         | 45+             | 0.49          | 1.13    | 0.05-4.48 | 0.53           | 0.73    | 0.13-2.20 |
|                            | 1938-1940       | 1.12          | 0.04    | 1.03-1.21 | 0.71           | 0.01    | 0.69-0.73 |
|                            | 1941-1945       | 1.08          | 0.03    | 1.03-1.14 | 0.80           | 0.01    | 0.78-0.82 |
|                            | 1946-1950 (ref) | 1.00          | 0.00    | 1.00-1.00 | 1.00           | 0.00    | 1.00-1.00 |
|                            | 1951-1955       | 0.95          | 0.03    | 0.90-1.01 | 1.46           | 0.02    | 1.41-1.50 |
| N                          | 1956-1960       | 0.91          | 0.05    | 0.82-1.01 | 2.23           | 0.02    | 2.14-2.32 |
|                            | 3 (ref)         |               |         |           | 1.00           | 0.00    | 1.00-1.00 |
|                            | 4               |               |         |           | 0.82           | 0.01    | 0.80-0.84 |
|                            | 5               |               |         |           | 0.73           | 0.01    | 0.71-0.75 |
| N                          | 6               |               |         |           | 0.66           | 0.02    | 0.64-0.68 |
|                            | 7               |               |         |           | 0.60           | 0.02    | 0.57-0.62 |
|                            | N               |               | 150,907 |           |                | 150,907 |           |

TABLE S16. Preceding Birth Interval: Robustness Checks Using Alternative Specifications of Birth Interval Variable.

|            |                   | Fitness        |                |               |               | Height         |                |               |               |
|------------|-------------------|----------------|----------------|---------------|---------------|----------------|----------------|---------------|---------------|
|            |                   | Between-family |                | Within-family |               | Between-family |                | Within-family |               |
|            |                   | Beta           | 95% CI         | Beta          | 95% CI        | Beta           | 95% CI         | Beta          | 95% CI        |
| Binary     | 0-24 months (ref) | 0.000          |                | 0.00          |               | 0.000          |                | 0.000         |               |
|            | >24 months        | -0.051         | -0.066, -0.036 | 0.011         | -0.015, 0.036 | -0.035         | -0.050, -0.021 | 0.001         | -0.019, 0.022 |
| Binary     | 0-18 months (ref) | 0.000          |                | 0.000         |               | 0.000          |                | 0.000         |               |
|            | >18 months        | -0.032         | -0.053, -0.012 | 0.005         | -0.028, 0.039 | -0.019         | -0.039, 0.001  | 0.007         | -0.020, 0.035 |
| Continuous | Interval (months) | -0.002         | -0.002, -0.002 | 0.000         | -0.001, 0.000 | -0.001         | -0.001, -0.001 | 0.000         | 0.000, 0.001  |
| Quadratic  | Interval (months) | -0.003         | -0.005, -0.002 | -0.003        | -0.007, 0.001 | -0.002         | -0.003, -0.001 | 0.000         | -0.004, 0.003 |
|            | Interval squared  | 0.000          | 0.000, 0.000   | 0.000         | 0.000, 0.000  | 0.000          | 0.000, 0.000   | 0.000         | 0.000, 0.000  |
|            |                   | Underweight    |                |               |               | Overweight     |                |               |               |
|            |                   | Between-family |                | Within-family |               | Between-family |                | Within-family |               |
|            |                   | Beta           | 95% CI         | Beta          | 95% CI        | Beta           | 95% CI         | Beta          | 95% CI        |
| Binary     | 0-24 months (ref) | 0.000          |                | 0.00          |               | 0.000          |                | 0.000         |               |
|            | >24 months        | 0.000          | -0.004, 0.004  | 0.005         | -0.003, 0.012 | 0.016          | 0.011, 0.021   | 0.006         | -0.003, 0.015 |
| Binary     | 0-18 months (ref) | 0.000          |                | 0.000         |               | 0.000          |                | 0.000         |               |
|            | >18 months        | -0.004         | -0.010, 0.001  | 0.006         | -0.004, 0.016 | 0.013          | 0.006, 0.019   | 0.009         | -0.003, 0.021 |
| Continuous | Interval (months) | 0.000          | 0.000, 0.000   | 0.000         | 0.000, 0.000  | 0.001          | 0.001, 0.001   | 0.000         | 0.000, 0.001  |
| Quadratic  | Interval (months) | 0.000          | 0.000, 0.000   | 0.000         | -0.001, 0.002 | 0.000          | 0.000, 0.001   | 0.000         | -0.002, 0.001 |
|            | Interval squared  | 0.000          | 0.000, 0.000   | 0.000         | 0.000, 0.000  | 0.000          | 0.000, 0.000   | 0.000         | 0.000, 0.000  |
|            |                   | Mortality      |                |               |               |                |                |               |               |
|            |                   | Between-family |                | Within-family |               |                |                |               |               |
|            |                   | RR             | 95% CI         | RR            | 95% CI        |                |                |               |               |
| Binary     | 0-24 months (ref) | 1.00           |                | 1.00          |               |                |                |               |               |
|            | >24 months        | 1.04           | 1.02-1.06      | 1.02          | 0.98-1.05     |                |                |               |               |
| Binary     | 0-18 months (ref) | 1.00           |                | 1.00          |               |                |                |               |               |
|            | >18 months        | 1.03           | 1.00-1.06      | 1.01          | 0.97-1.05     |                |                |               |               |
| Continuous | Interval (months) | 1.00           | 1.00-1.00      | 1.00          | 1.00-1.00     |                |                |               |               |
| Quadratic  | Interval (months) | 1.00           | 1.00-1.00      | 1.00          | 1.00-1.00     |                |                |               |               |
|            | Interval squared  | 1.00           | 1.00-1.00      | 1.00          | 1.00-1.00     |                |                |               |               |



TABLE S17. Subsequent Birth Interval: Robustness Checks Using Alternative Specifications of Birth Interval Variable.

|            |                   | Fitness        |               |               |               | Height         |               |               |               |
|------------|-------------------|----------------|---------------|---------------|---------------|----------------|---------------|---------------|---------------|
|            |                   | Between-family |               | Within-family |               | Between-family |               | Within-family |               |
|            |                   | Beta           | 95% CI        | Beta          | 95% CI        | Beta           | 95% CI        | Beta          | 95% CI        |
| Binary     | 0-24 months (ref) | 0.000          |               | 0.00          |               | 0.000          |               | 0.000         |               |
|            | >24 months        | -0.003         | -0.018, 0.012 | -0.011        | -0.037, 0.016 | -0.011         | -0.026, 0.004 | 0.011         | -0.011, 0.032 |
| Binary     | 0-18 months (ref) | 0.000          |               | 0.000         |               | 0.000          |               | 0.000         |               |
|            | >18 months        | 0.019          | -0.003, 0.041 | -0.009        | -0.044, 0.026 | 0.028          | 0.007, 0.050  | 0.024         | -0.004, 0.052 |
| Continuous | Interval (months) | 0.000          | 0.000, 0.000  | 0.000         | 0.000, 0.000  | 0.000          | 0.000, 0.000  | 0.000         | 0.000, 0.000  |
| Quadratic  | Interval (months) | 0.000          | -0.001, 0.000 | 0.000         | -0.001, 0.001 | 0.000          | -0.001, 0.000 | 0.000         | -0.001, 0.001 |
|            | Interval squared  | 0.000          | 0.000, 0.000  | 0.000         | 0.000, 0.000  | 0.000          | 0.000, 0.000  | 0.000         | 0.000, 0.000  |
|            |                   | Underweight    |               |               |               | Overweight     |               |               |               |
|            |                   | Between-family |               | Within-family |               | Between-family |               | Within-family |               |
|            |                   | Beta           | 95% CI        | Beta          | 95% CI        | Beta           | 95% CI        | Beta          | 95% CI        |
| Binary     | 0-24 months (ref) | 0.000          |               | 0.00          |               | 0.000          |               | 0.000         |               |
|            | >24 months        | 0.001          | -0.003, 0.005 | -0.005        | -0.013, 0.002 | -0.001         | -0.006, 0.004 | 0.005         | -0.004, 0.014 |
| Binary     | 0-18 months (ref) | 0.000          |               | 0.000         |               | 0.000          |               | 0.000         |               |
|            | >18 months        | 0.003          | -0.003, 0.008 | 0.001         | -0.009, 0.011 | -0.007         | -0.014, 0.000 | 0.000         | -0.012, 0.012 |
| Continuous | Interval (months) | 0.000          | 0.000, 0.000  | 0.000         | 0.000, 0.000  | 0.000          | 0.000, 0.000  | 0.000         | 0.000, 0.000  |
| Quadratic  | Interval (months) | 0.000          | 0.000, 0.000  | 0.000         | -0.001, 0.000 | 0.000          | 0.000, 0.000  | 0.000         | 0.000, 0.001  |
|            | Interval squared  | 0.000          | 0.000, 0.000  | 0.000         | 0.000, 0.000  | 0.000          | 0.000, 0.000  | 0.000         | 0.000, 0.000  |
|            |                   | Mortality      |               |               |               |                |               |               |               |
|            |                   | Between-family |               | Within-family |               |                |               |               |               |
|            |                   | RR             | 95% CI        | RR            | 95% CI        |                |               |               |               |
| Binary     | 0-24 months (ref) | 1.00           |               | 1.00          |               |                |               |               |               |
|            | >24 months        | 1.10           | 1.08-1.12     | 0.98          | 0.95-1.01     |                |               |               |               |
| Binary     | 0-18 months (ref) | 1.00           |               | 1.00          |               |                |               |               |               |
|            | >18 months        | 1.10           | 1.07-1.12     | 0.99          | 0.95-1.03     |                |               |               |               |
| Continuous | Interval (months) | 1.00           | 1.00-1.00     | 1.00          | 1.00-1.00     |                |               |               |               |
| Quadratic  | Interval (months) | 1.00           | 1.00-1.00     | 1.00          | 1.00-1.00     |                |               |               |               |
|            | Interval squared  | 1.00           | 1.00-1.00     | 1.00          | 1.00-1.00     |                |               |               |               |

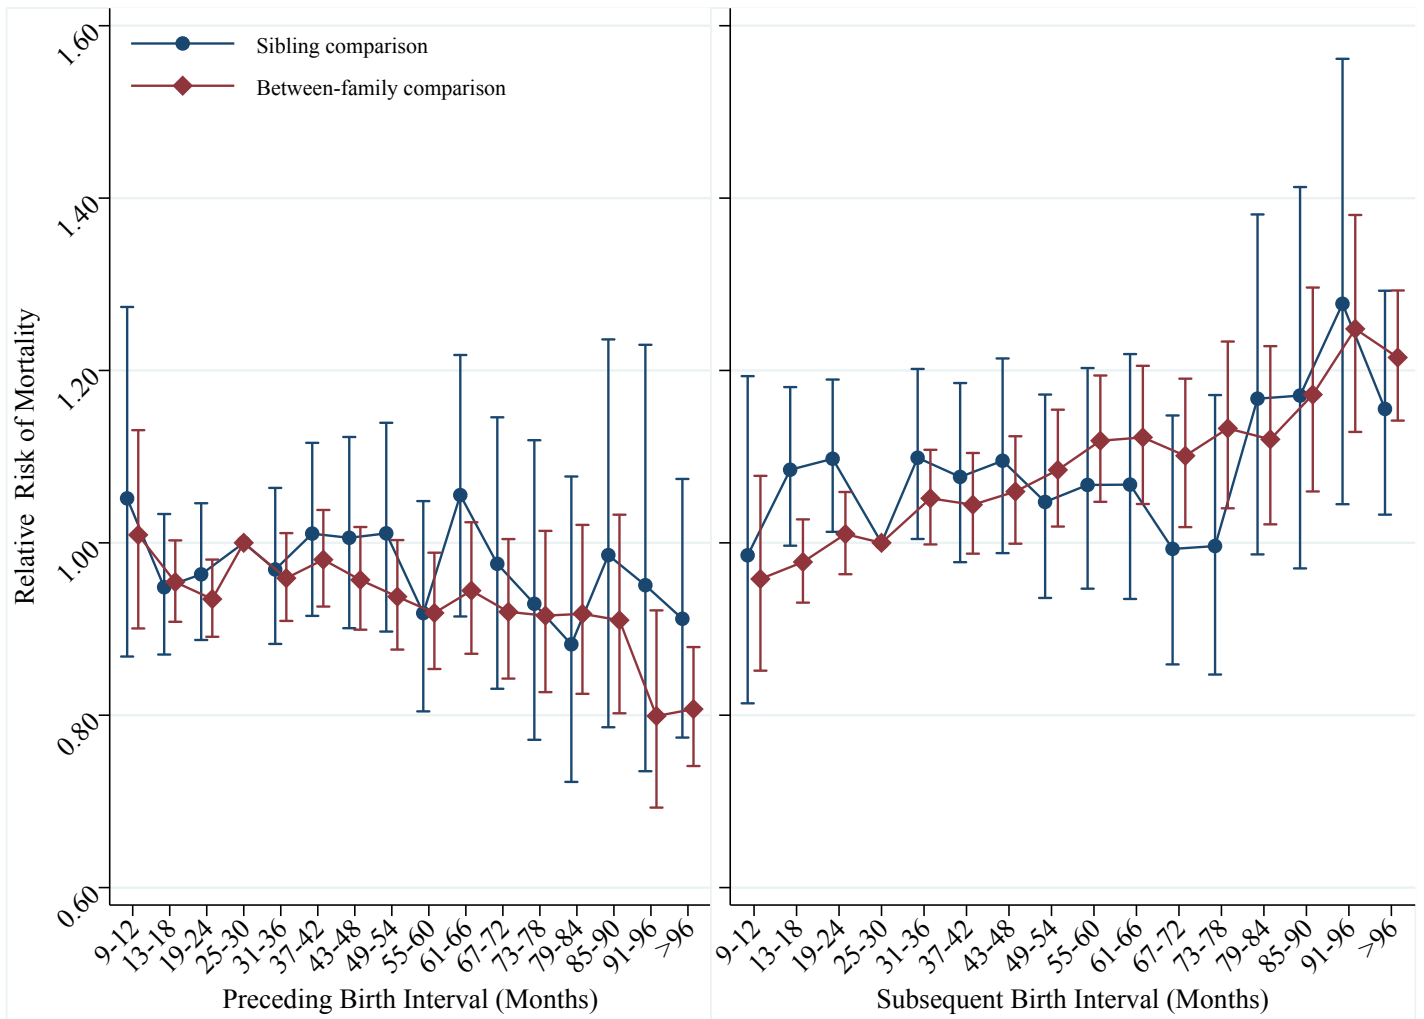

FIGURE S1. Hazard of mortality by preceding and subsequent birth intervals, Swedish men born 1938 to 1960. The analysis population for examining preceding birth intervals consists of individuals in sibling groups with at least three children, excluding the first-born. The analysis population for examining subsequent birth intervals consists of individuals in sibling groups with at least three children, excluding the last-born. Error bars are 95% confidence intervals.

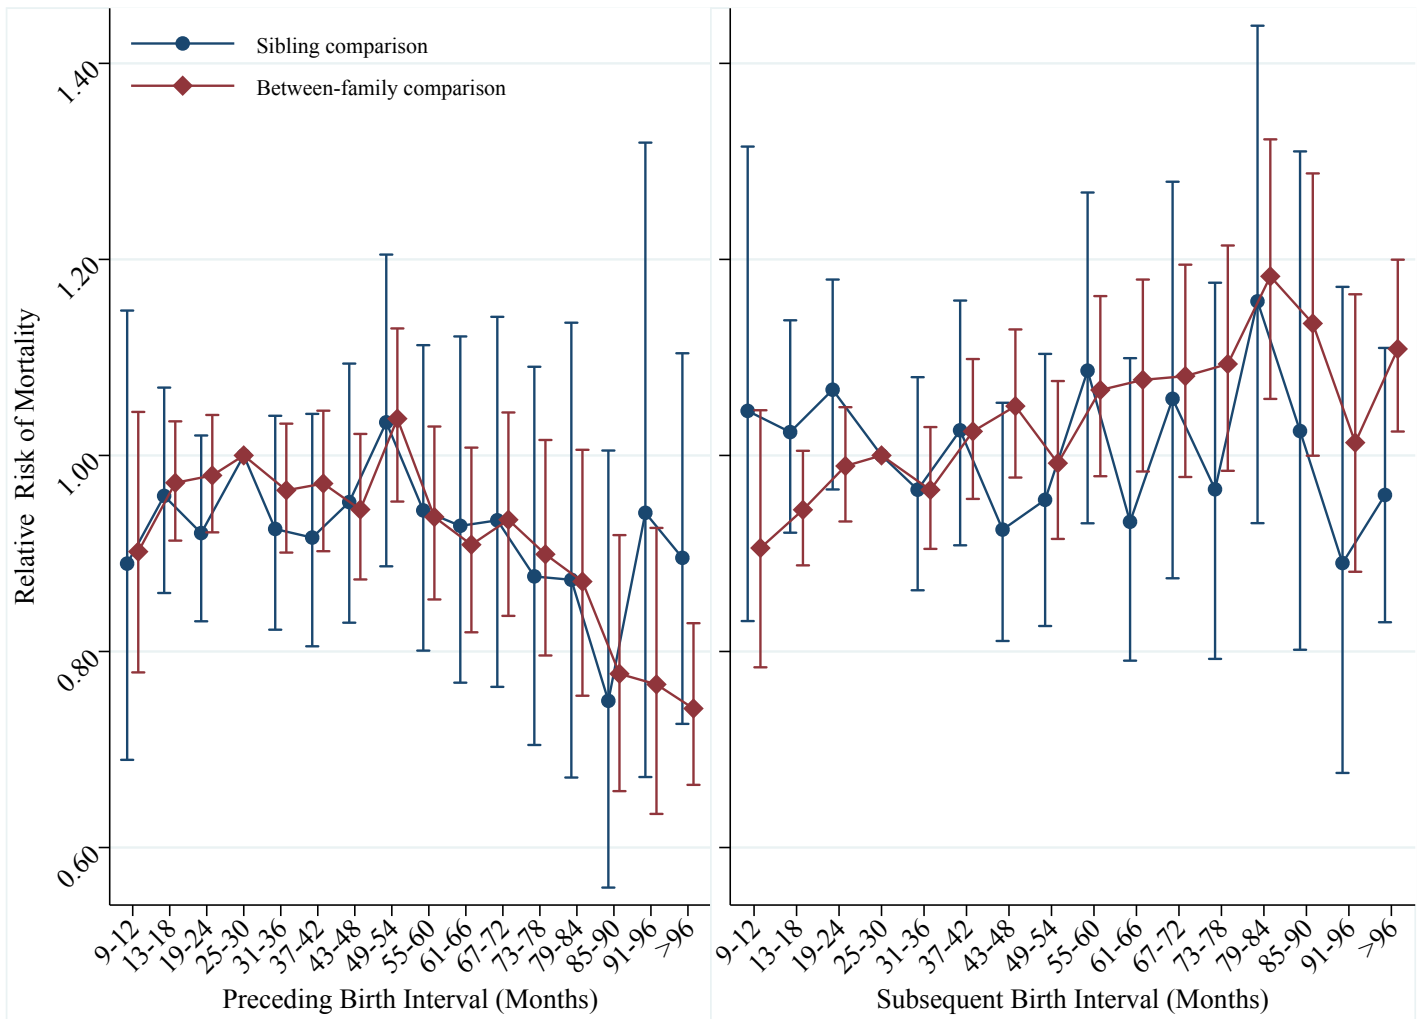

FIGURE S2. Hazard of mortality by preceding and subsequent birth intervals, Swedish women born 1938 to 1960. The analysis population for examining preceding birth intervals consists of individuals in sibling groups with at least three children, excluding the first-born. The analysis population for examining subsequent birth intervals consists of individuals in sibling groups with at least three children, excluding the last-born. Error bars are 95% confidence intervals.

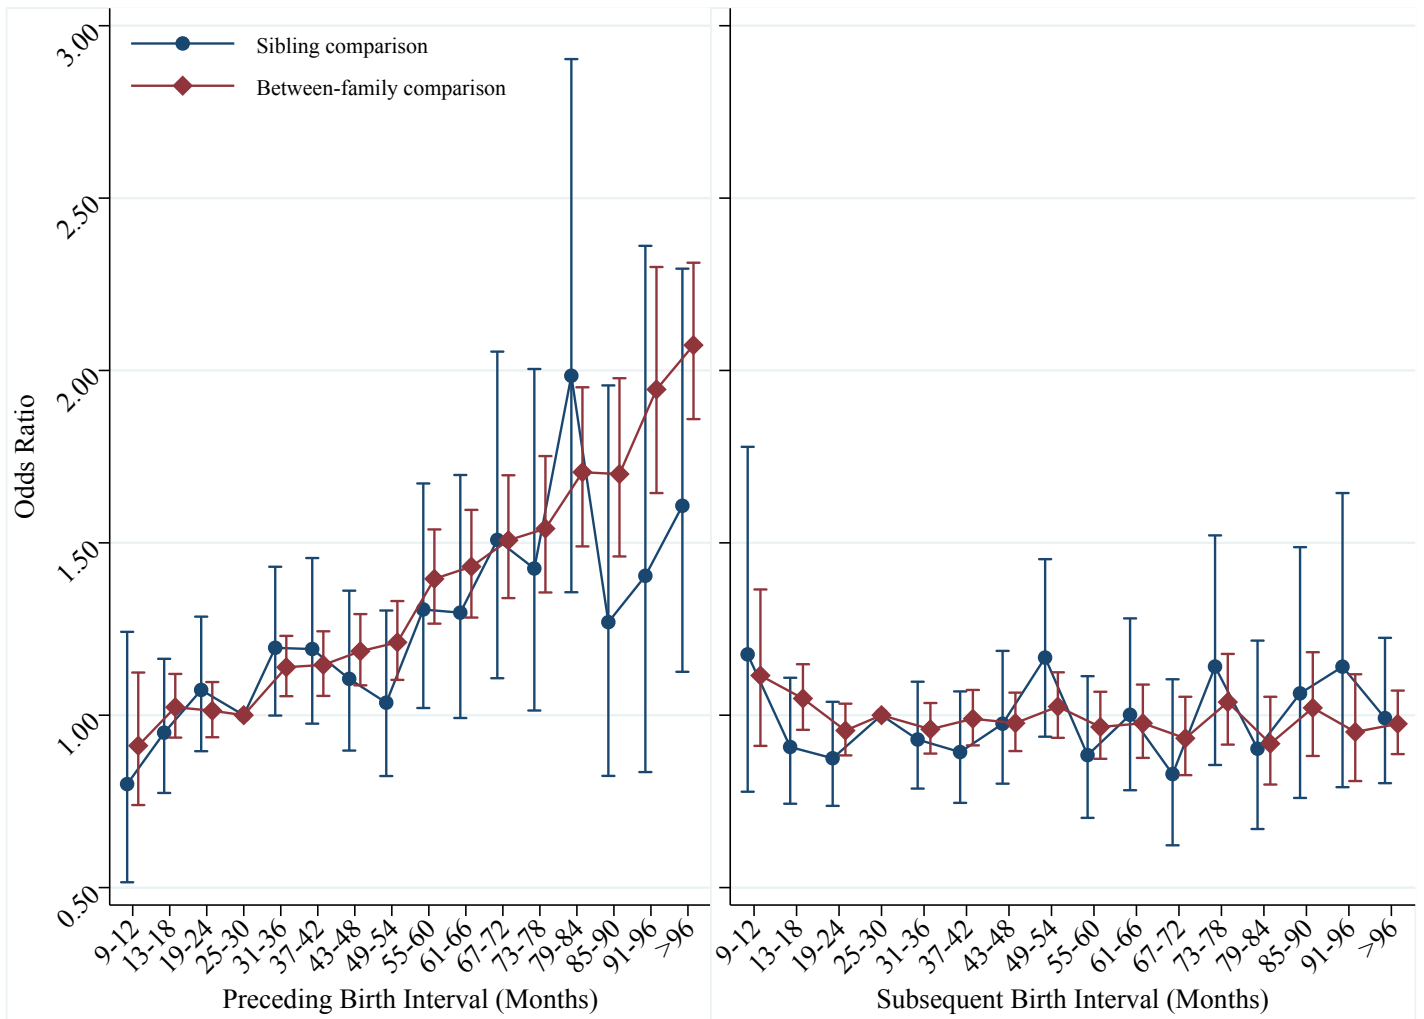

FIGURE S3. Odds ratios for being overweight or obese by preceding and subsequent birth intervals, Swedish men born 1962 to 1979. The analysis population for examining preceding birth intervals consists of individuals in sibling groups with at least three children, excluding the first-born. The analysis population for examining subsequent birth intervals consists of individuals in sibling groups with at least three male children, excluding the last-born. Error bars are 95% confidence intervals.

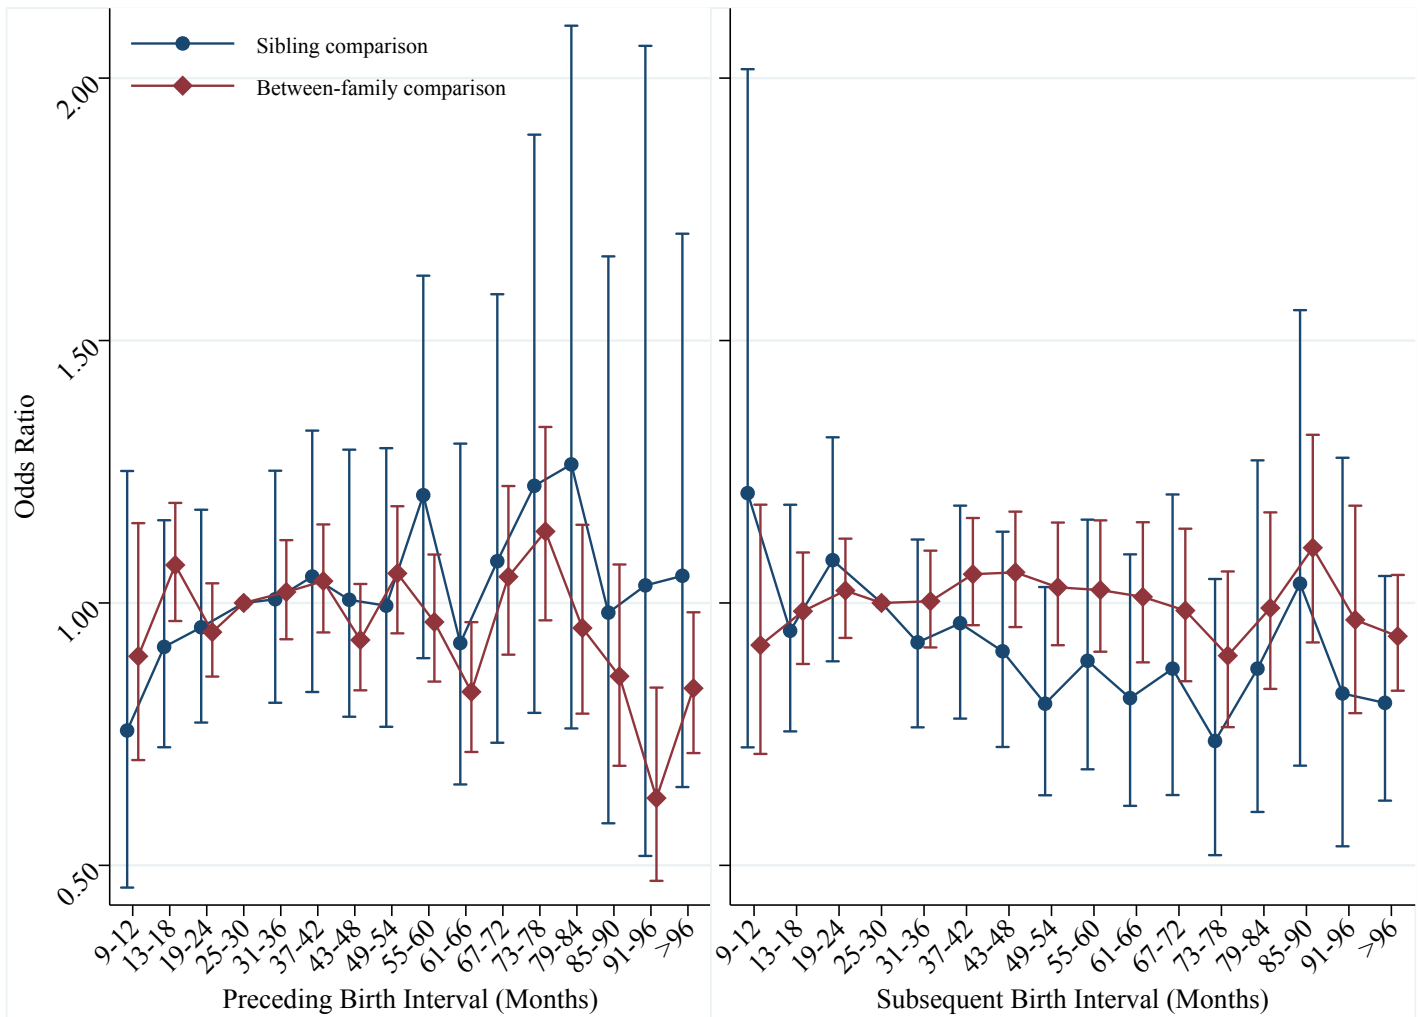

FIGURE S4. Odds ratios for being underweight by preceding and subsequent birth intervals, Swedish men born 1962 to 1979. The analysis population for examining preceding birth intervals consists of individuals in sibling groups with at least three children, excluding the first-born. The analysis population for examining subsequent birth intervals consists of individuals in sibling groups with at least three male children, excluding the last-born. Error bars are 95% confidence intervals.

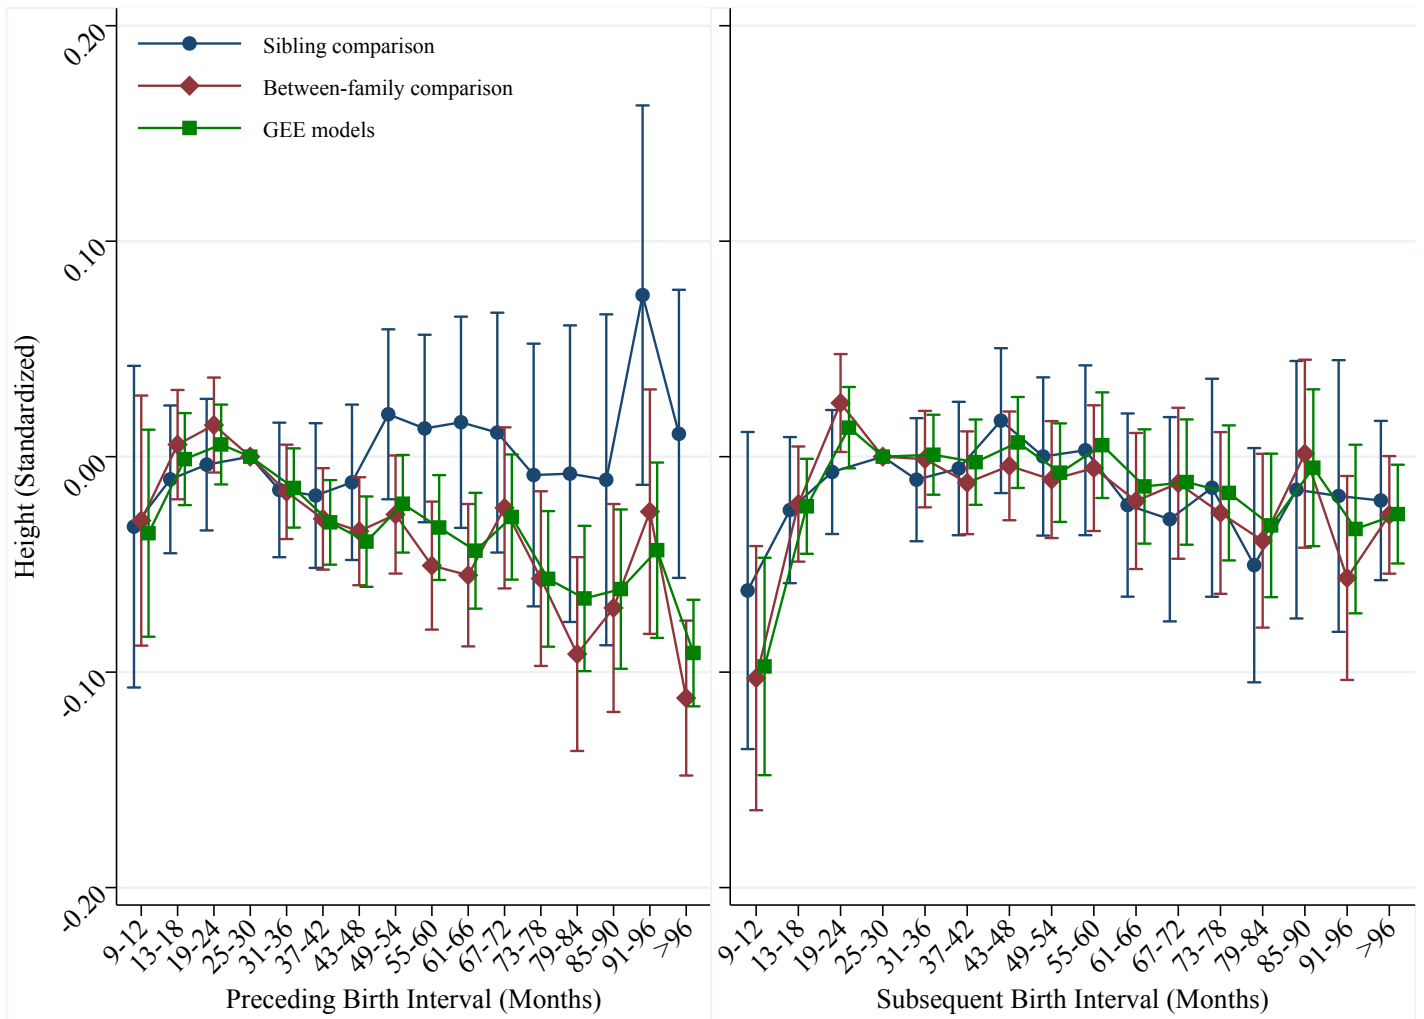

FIGURE S5. Height at ages 17 to 20 by preceding and subsequent birth intervals, Swedish men born 1962 to 1979. The analysis population for examining preceding birth intervals consists of individuals in sibling groups with at least three children, excluding the first-born. The analysis population for examining subsequent birth intervals consists of individuals in sibling groups with at least three male children, excluding the last-born. Error bars are 95% confidence intervals.

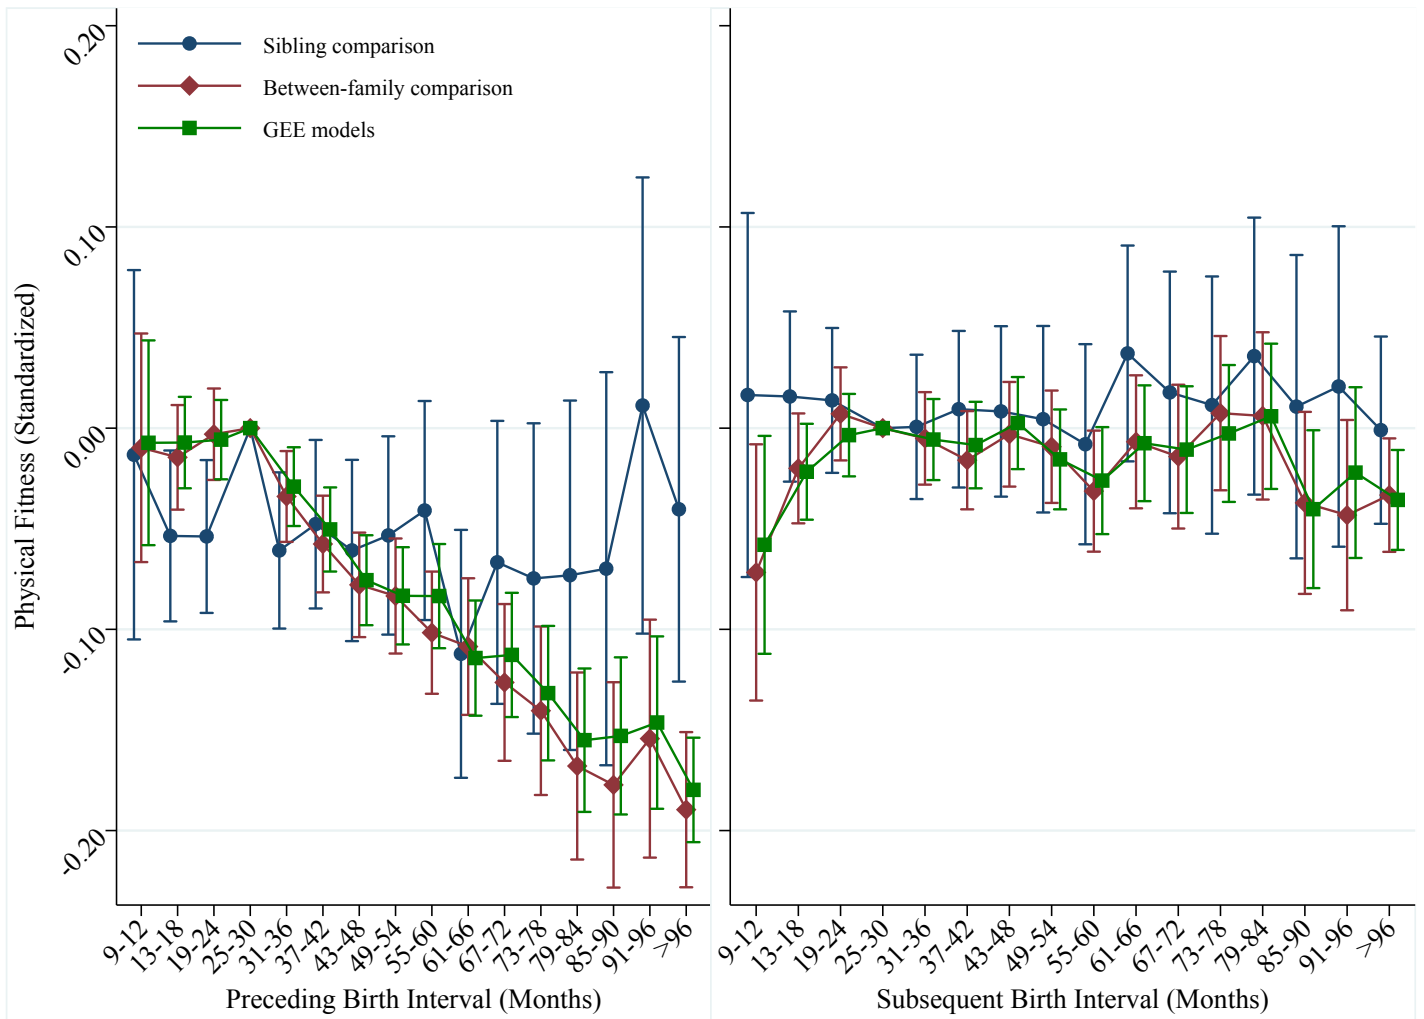

FIGURE S6. Physical fitness at ages 17 to 20 by preceding and subsequent birth intervals, Swedish men born 1962 to 1979. The analysis population for examining preceding birth intervals consists of individuals in sibling groups with at least three children, excluding the first-born. The analysis population for examining subsequent birth intervals consists of individuals in sibling groups with at least three male children, excluding the last-born. Error bars are 95% confidence intervals.

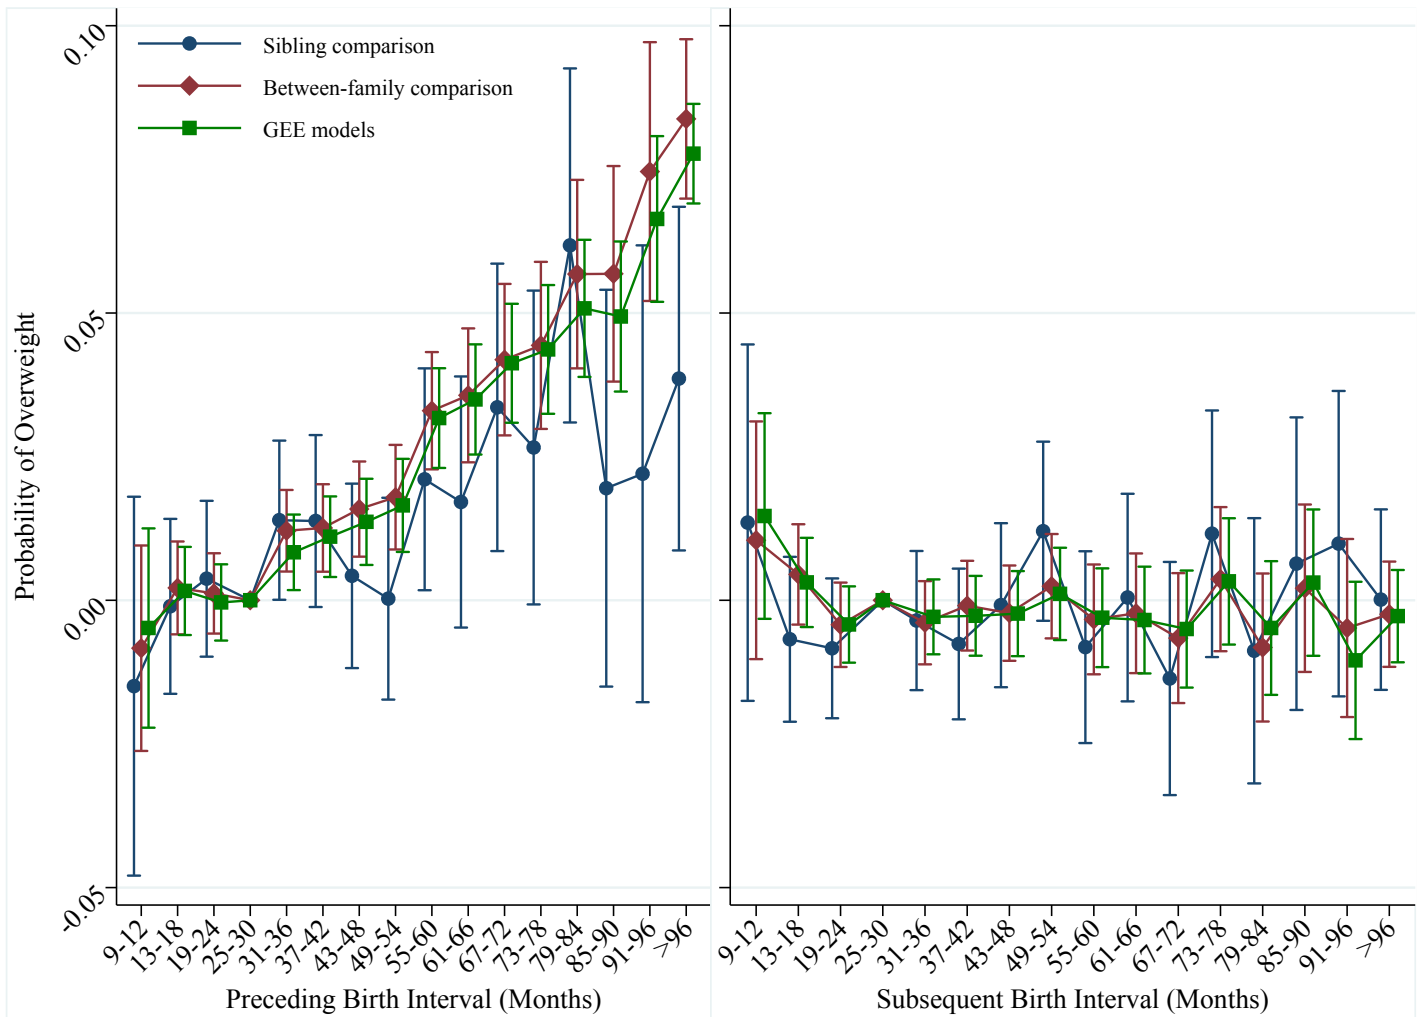

FIGURE S7. Predicted probability of being overweight or obese by preceding and subsequent birth intervals, Swedish men born 1962 to 1979. The analysis population for examining preceding birth intervals consists of individuals in sibling groups with at least three children, excluding the first-born. The analysis population for examining subsequent birth intervals consists of individuals in sibling groups with at least three male children, excluding the last-born. Error bars are 95% confidence intervals.



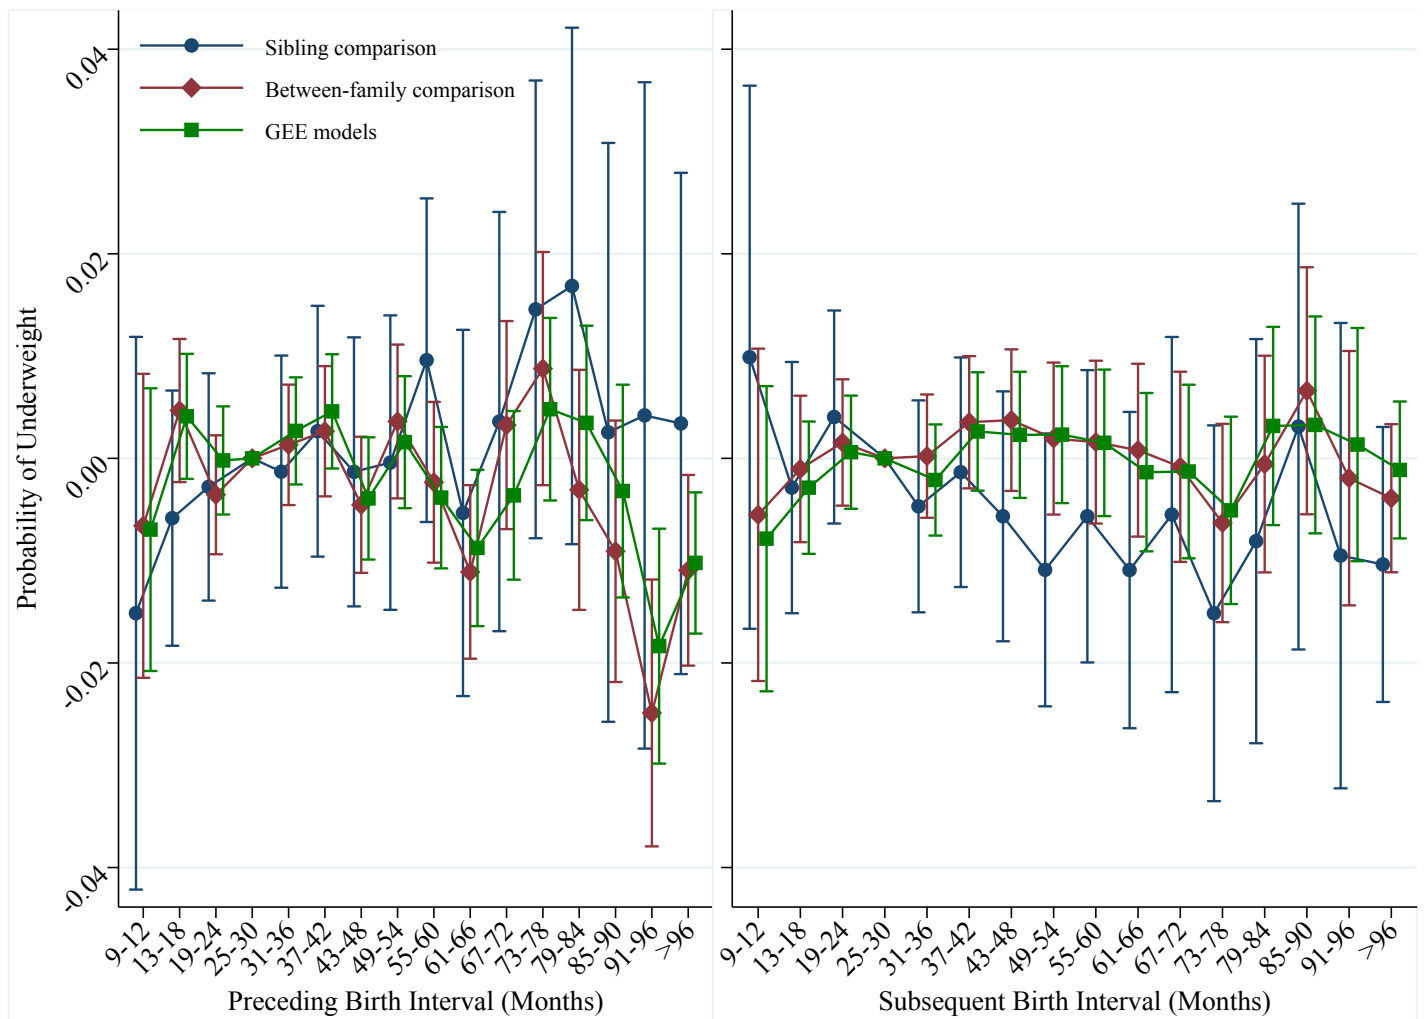

FIGURE S8. Predicted probability of being underweight by preceding and subsequent birth intervals, Swedish men born 1962 to 1979. The analysis population for examining preceding birth intervals consists of individuals in sibling groups with at least three children, excluding the first-born. The analysis population for examining subsequent birth intervals consists of individuals in sibling groups with at least three male children, excluding the last-born. Error bars are 95% confidence intervals.

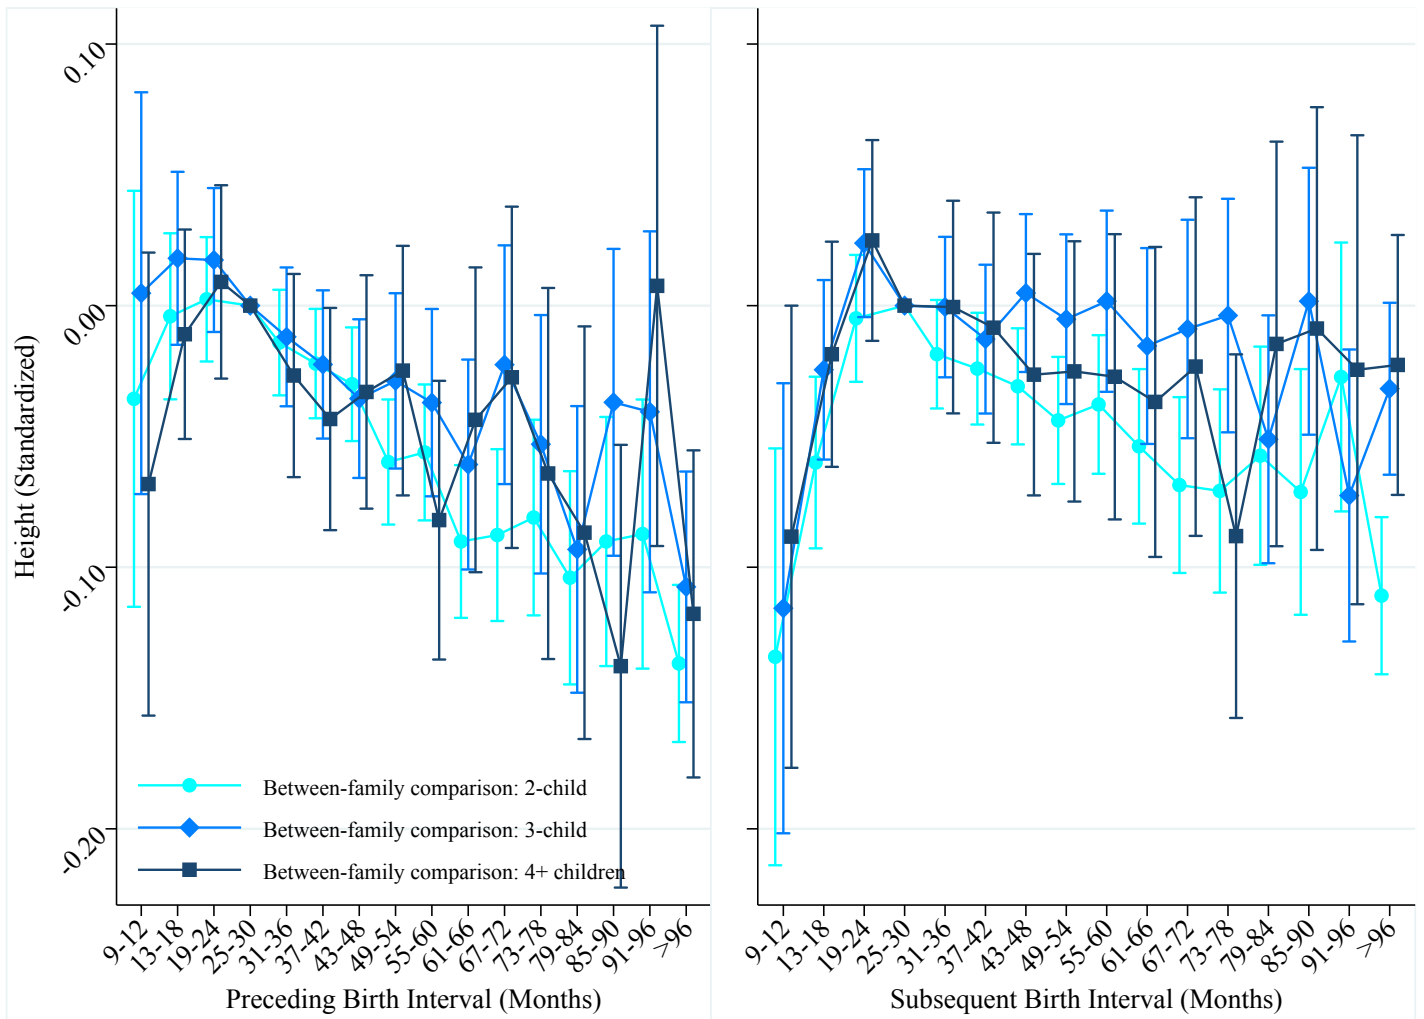

FIGURE S9. Height at ages 17 to 20 by preceding and subsequent birth intervals and by family size, Swedish men born 1962 to 1979. The analysis population for examining preceding birth intervals excludes first-borns. The analysis population for examining subsequent birth intervals excludes last-borns. Error bars are 95% confidence intervals.

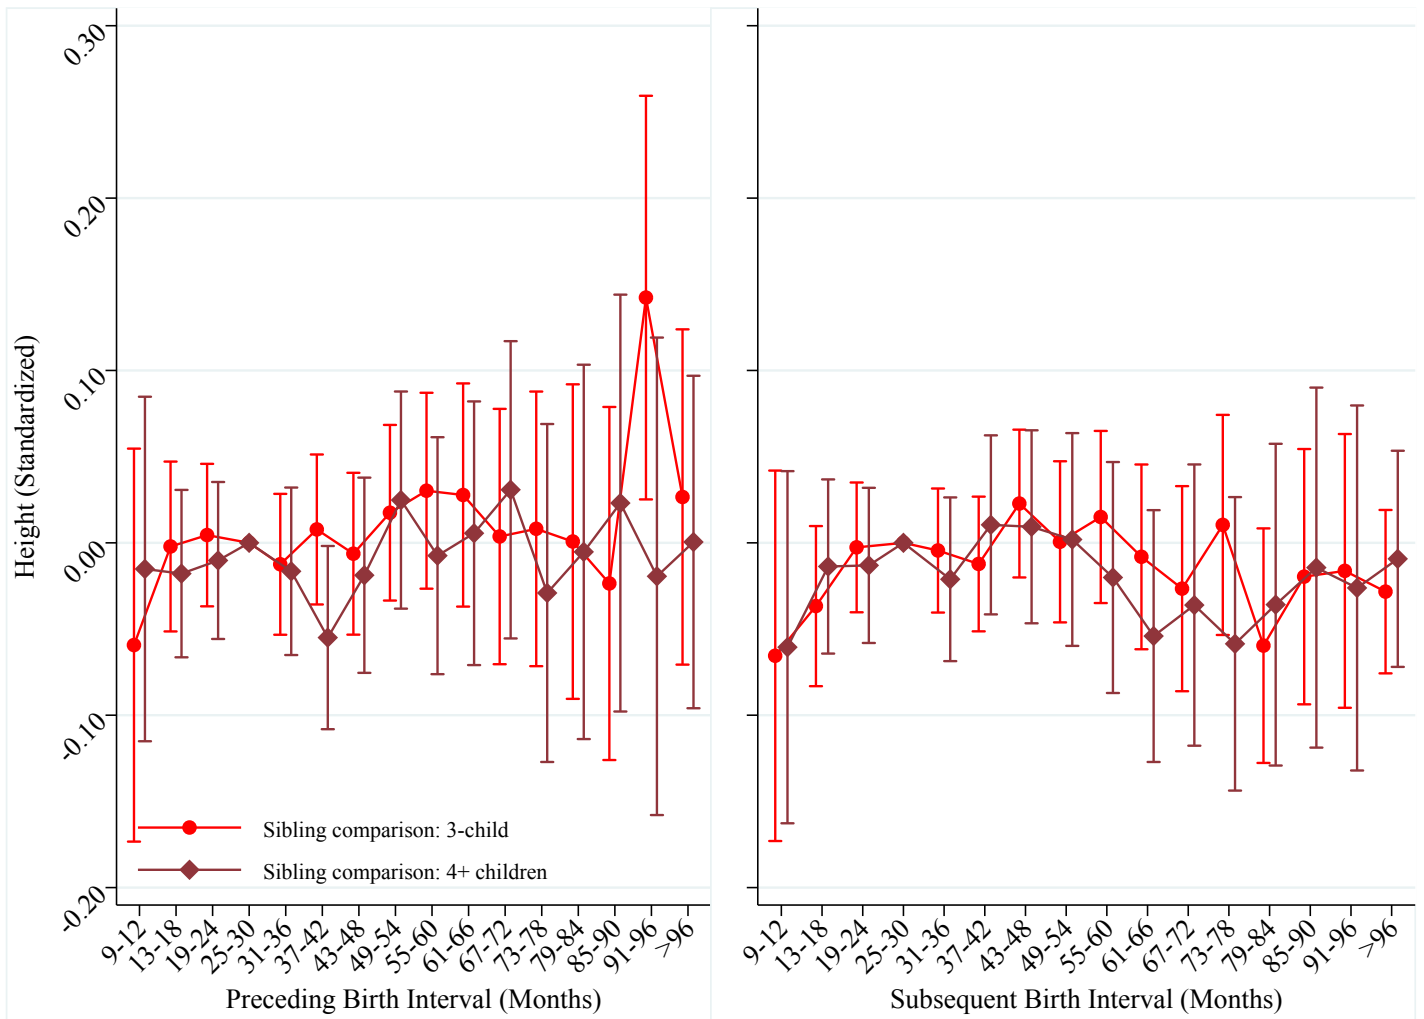

FIGURE S10. Height at ages 17 to 20 by preceding and subsequent birth intervals and by family size, Swedish men born 1962 to 1979. The analysis population for examining preceding birth intervals excludes first-borns. The analysis population for examining subsequent birth intervals excludes last-borns. Error bars are 95% confidence intervals.

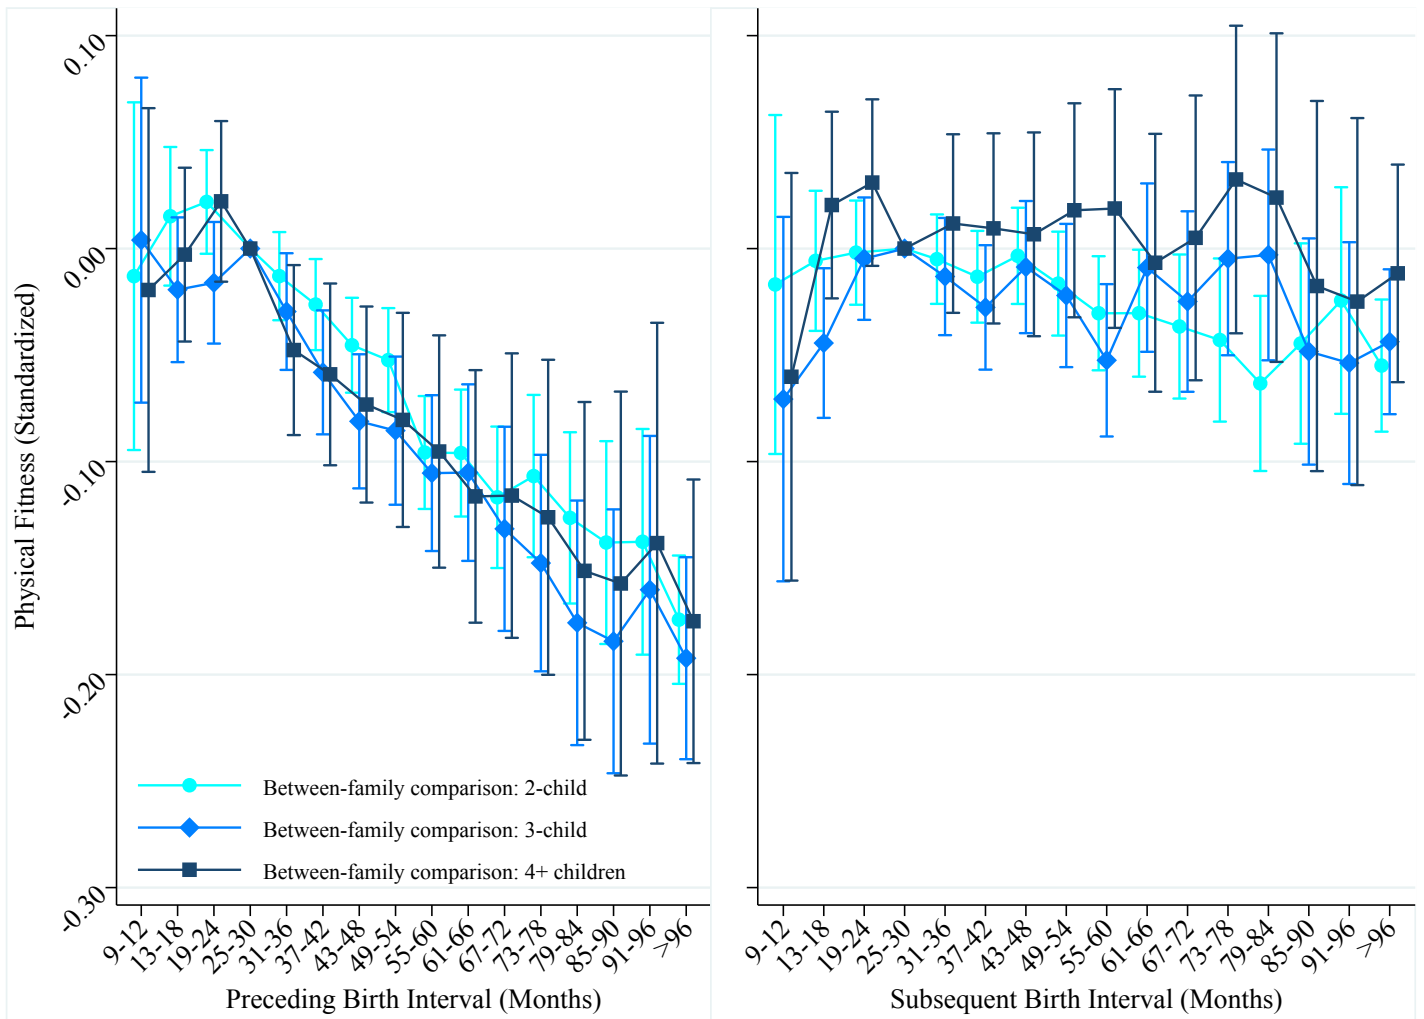

FIGURE S11. Physical fitness at ages 17 to 20 by preceding and subsequent birth intervals and by family size, Swedish men born 1962 to 1979. The analysis population for examining preceding birth intervals excludes first-borns. The analysis population for examining subsequent birth intervals excludes last-borns. Error bars are 95% confidence intervals.

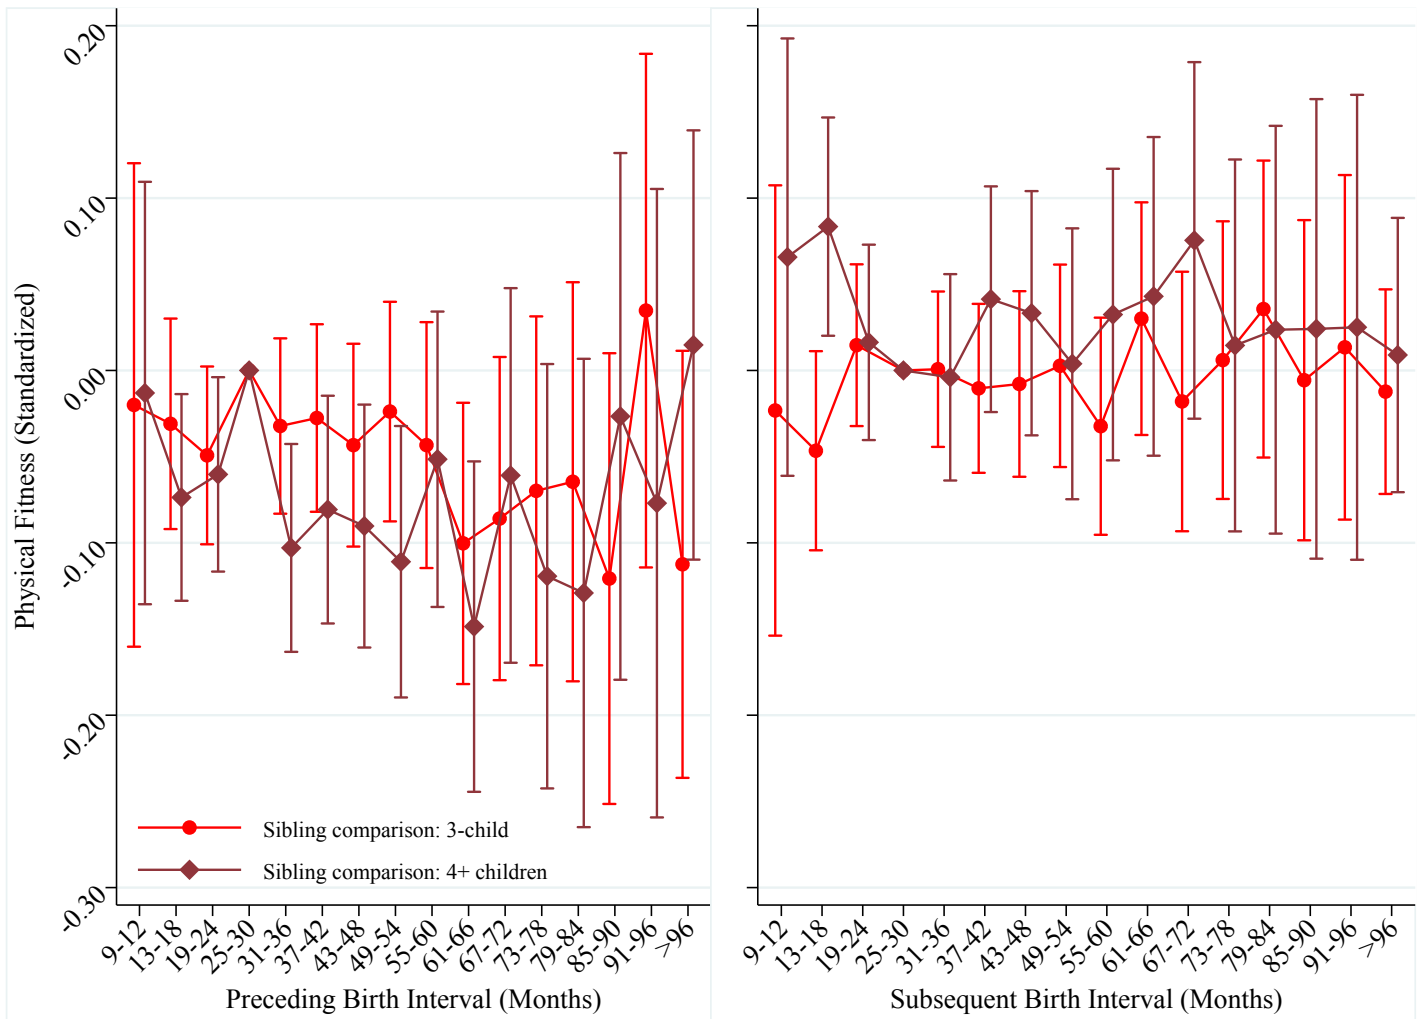

FIGURE S12. Physical fitness at ages 17 to 20 by preceding and subsequent birth intervals and by family size, Swedish men born 1962 to 1979. The analysis population for examining preceding birth intervals excludes first-borns. The analysis population for examining subsequent birth intervals excludes last-borns. Error bars are 95% confidence intervals.

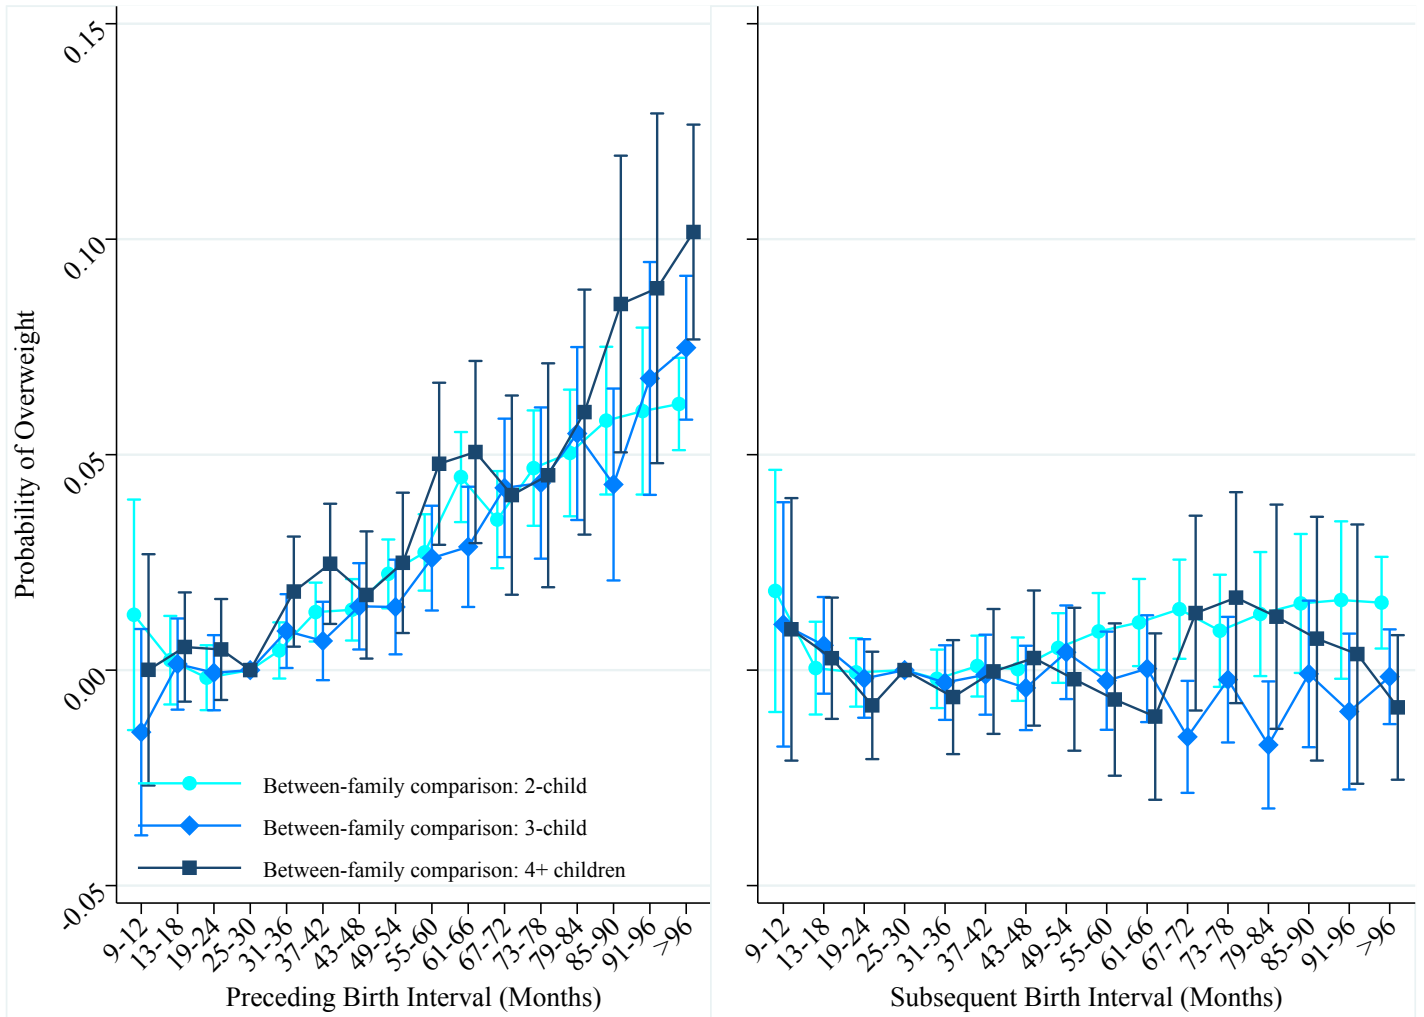

FIGURE S13. Predicted probability of being overweight or obese by preceding and subsequent birth intervals, Swedish men born 1962 to 1979. The analysis population for examining preceding birth intervals excludes first-borns. The analysis population for examining subsequent birth intervals excludes last-borns. Error bars are 95% confidence intervals.

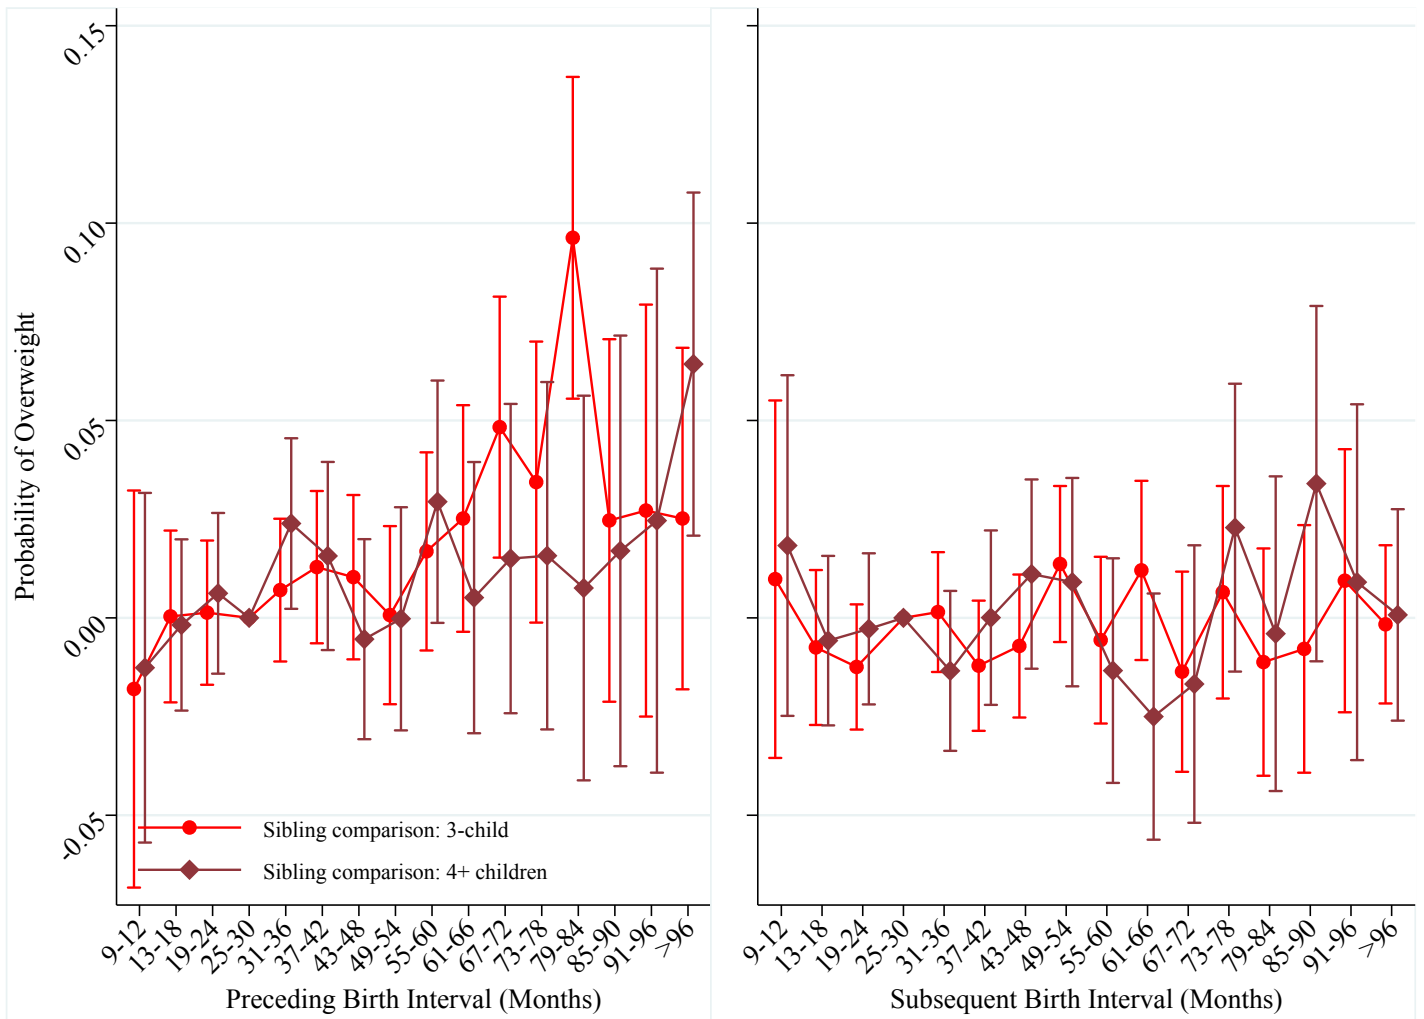

FIGURE S14. Predicted probability of being overweight or obese by preceding and subsequent birth intervals, Swedish men born 1962 to 1979. The analysis population for examining preceding birth intervals excludes first-borns. The analysis population for examining subsequent birth intervals excludes last-borns. Error bars are 95% confidence intervals.

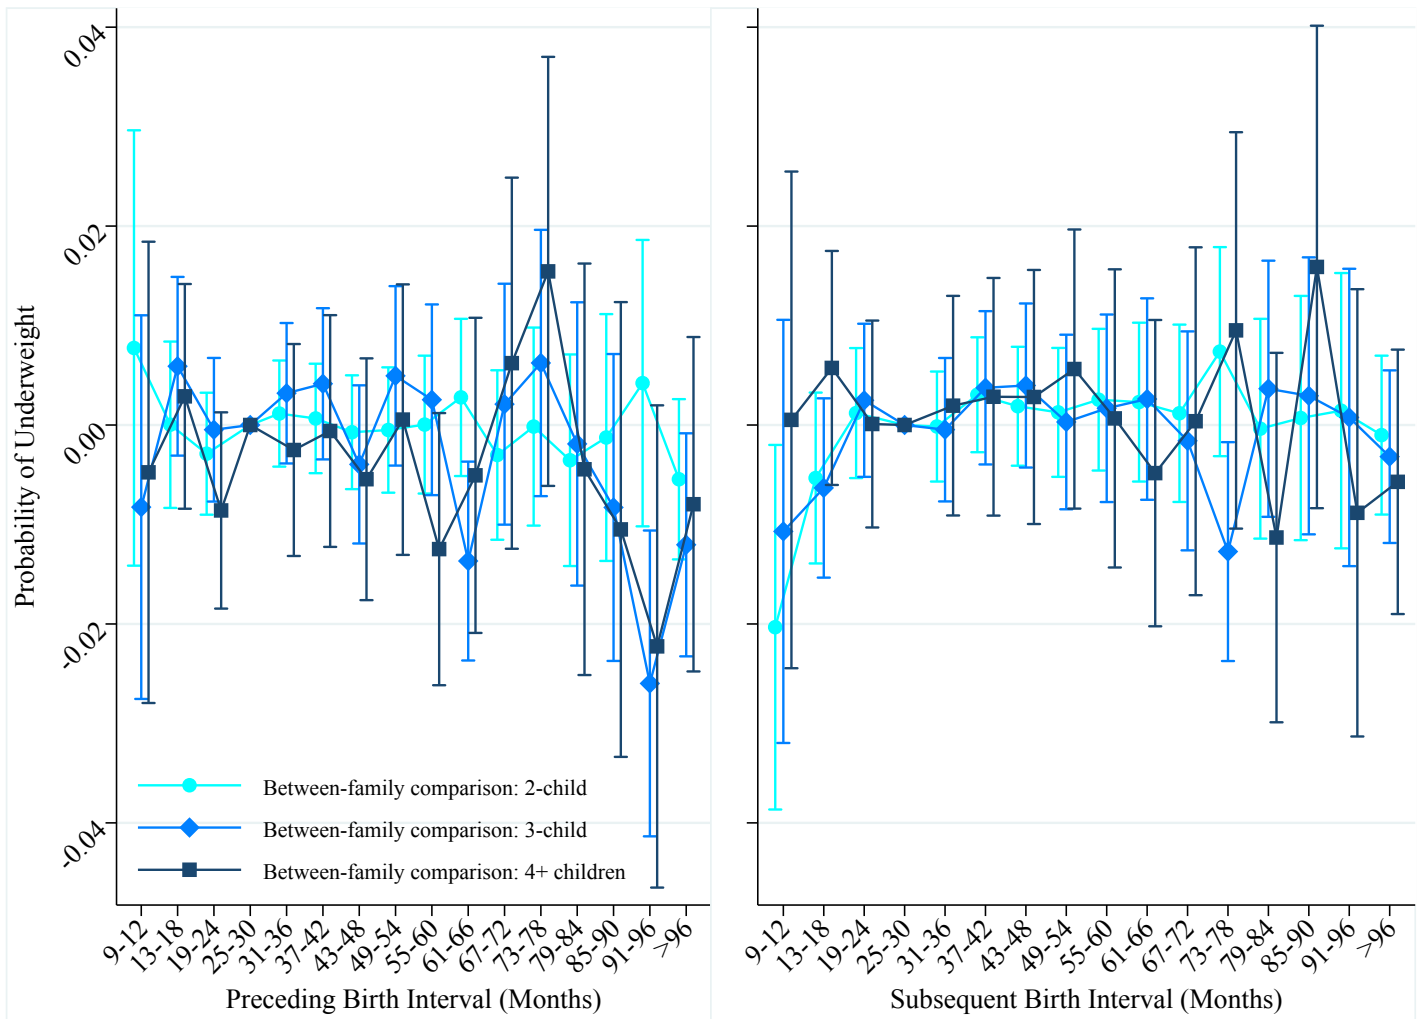

FIGURE S15. Predicted probability of being underweight by preceding and subsequent birth intervals, Swedish men born 1962 to 1979. The analysis population for examining preceding birth intervals excludes first-borns. The analysis population for examining subsequent birth intervals excludes last-borns. Error bars are 95% confidence intervals.



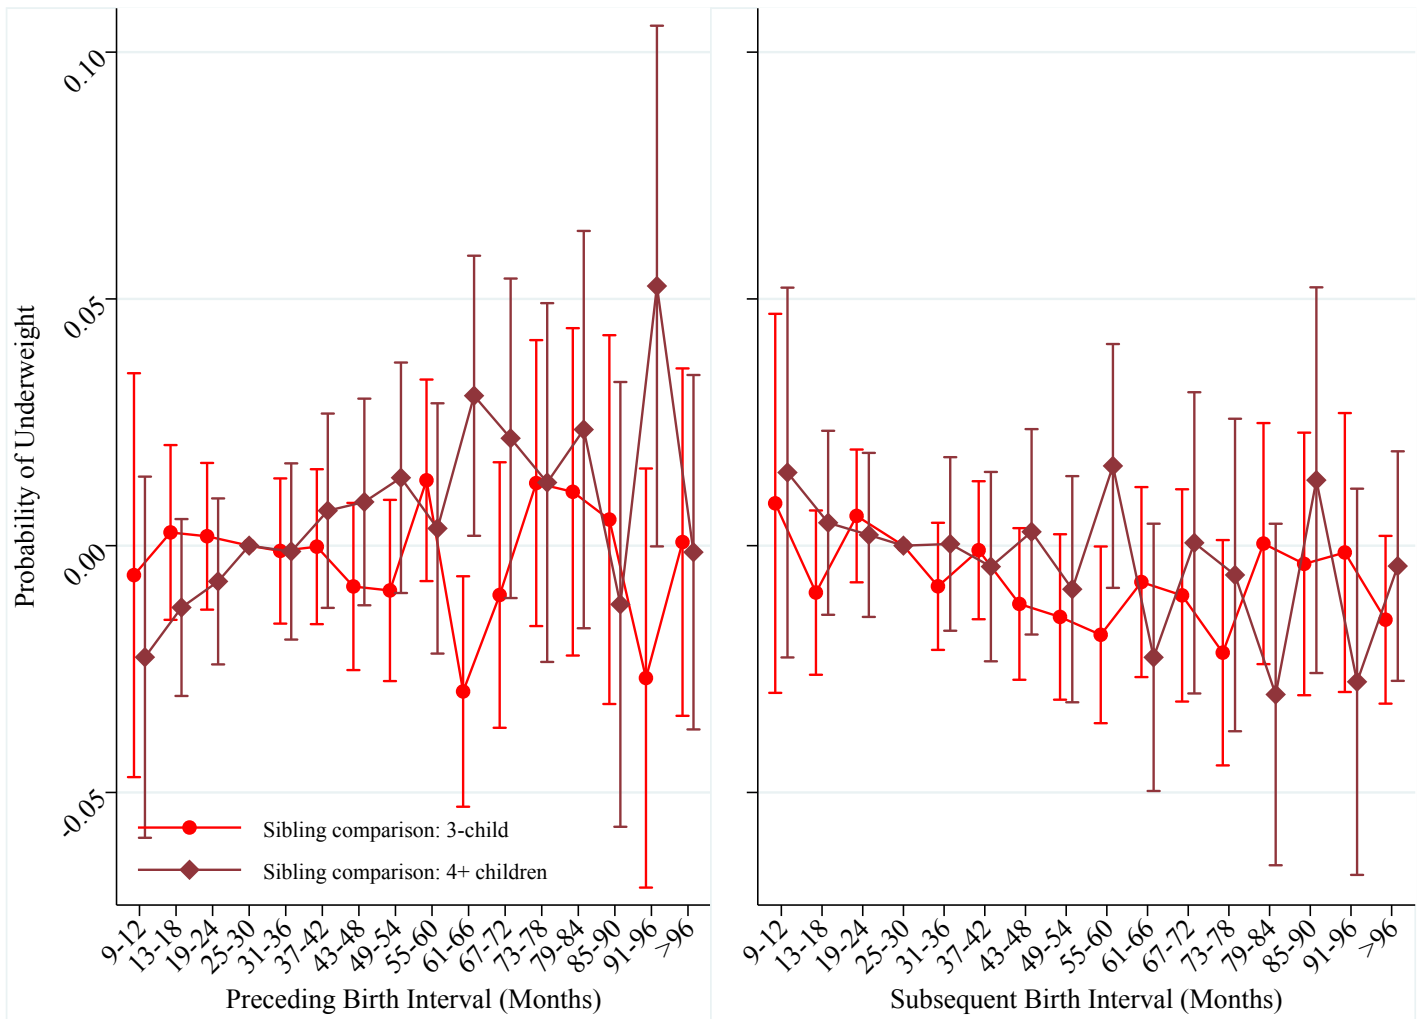

FIGURE S16. Predicted probability of being underweight by preceding and subsequent birth intervals, Swedish men born 1962 to 1979. The analysis population for examining preceding birth intervals excludes first-borns. The analysis population for examining subsequent birth intervals excludes last-borns. Error bars are 95% confidence intervals.

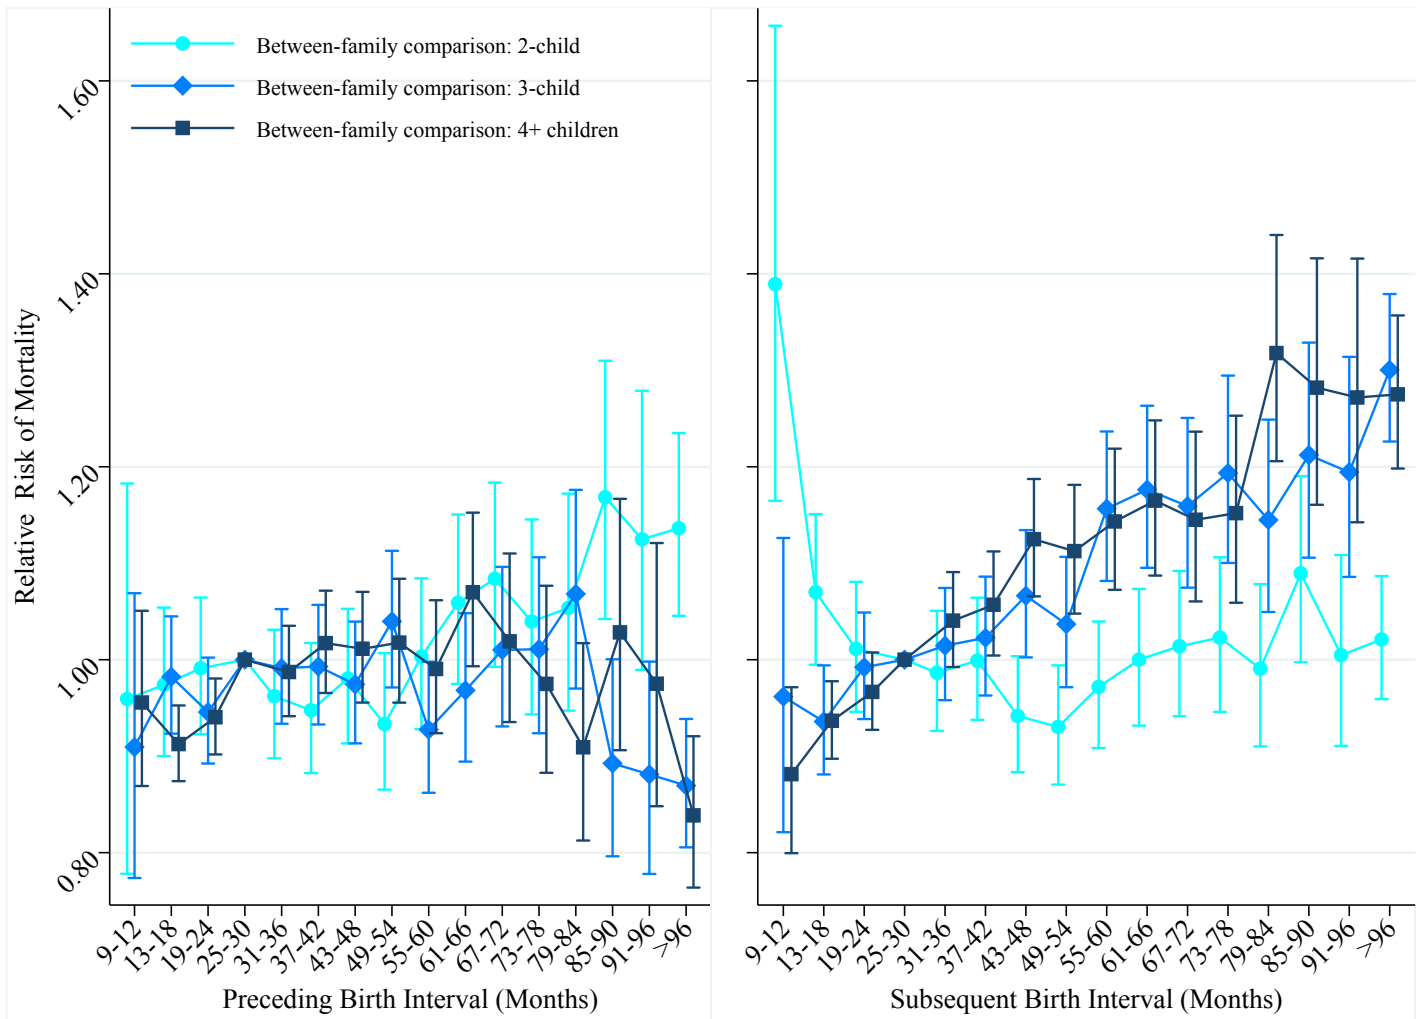

FIGURE S17. Hazard of mortality by preceding and subsequent birth intervals, Swedish men and women born 1938 to 1960. The analysis population for examining preceding birth intervals excludes first-borns. The analysis population for examining subsequent birth intervals excludes last-borns. Error bars are 95% confidence intervals.

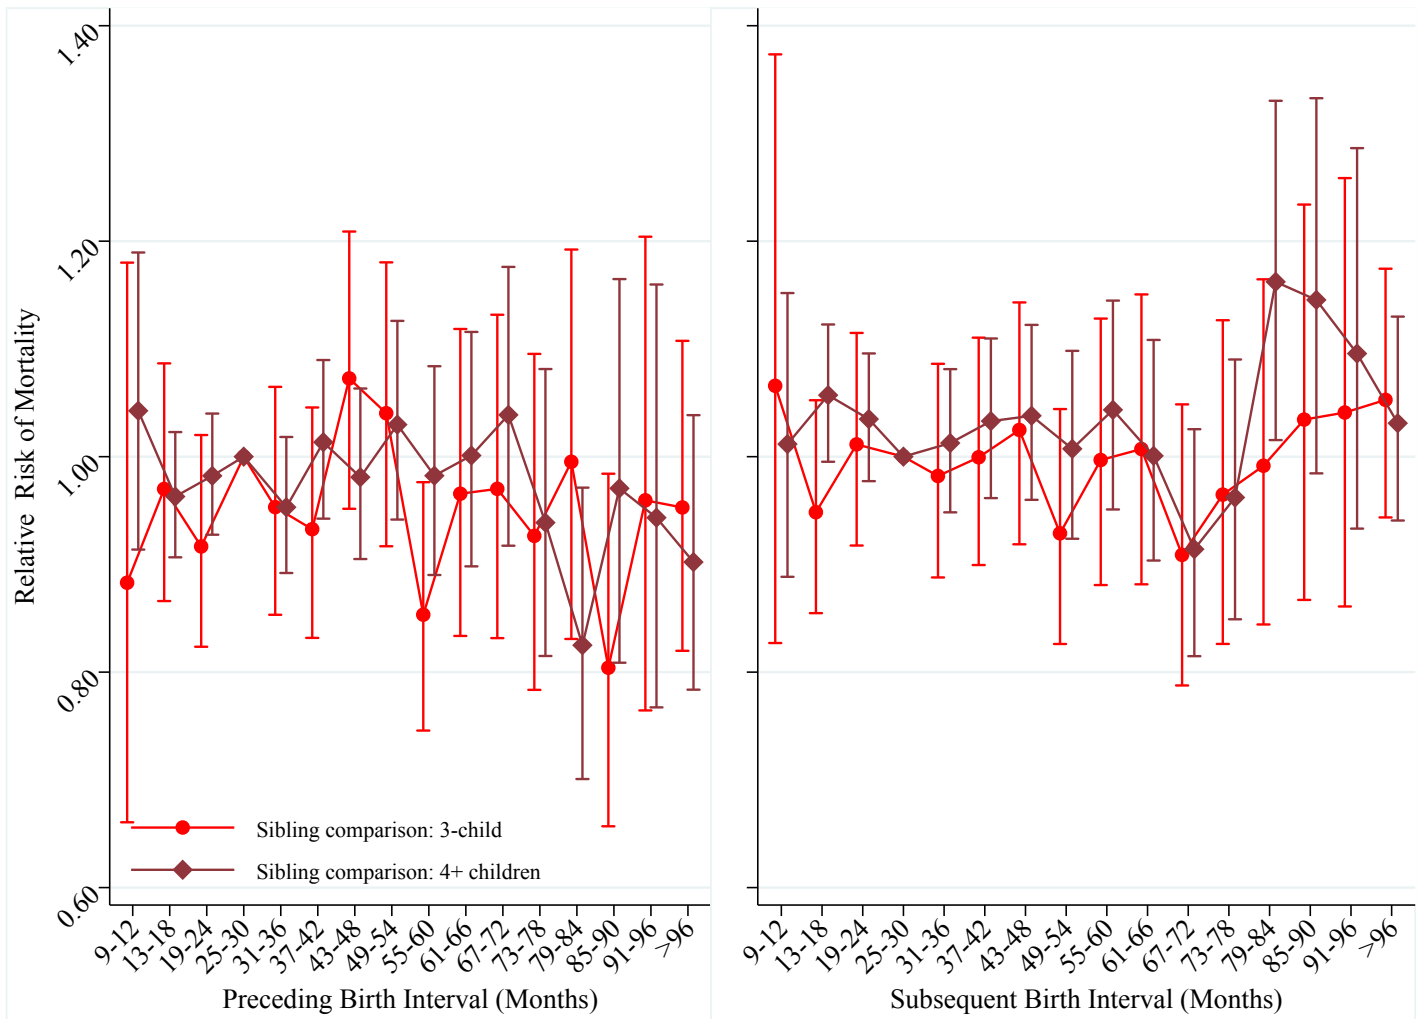

FIGURE S18. Hazard of mortality by preceding and subsequent birth intervals, Swedish men and women born 1938 to 1960. The analysis population for examining preceding birth intervals excludes first-borns. The analysis population for examining subsequent birth intervals excludes last-borns. Error bars are 95% confidence intervals.
